# Supplementary material
Source: publisher figshare collection journal article supplement (https://asha.figshare.com/articles/dataset/_/24964473)
Supplement: Supplementary file 3 [file 1]

**Table S26**

*Myotonic Dystrophy: Study Design Details and Participant Characteristics for Speech Warming Up Exercises as a Treatment Modality*

| Source                 | N  | Study design                    | Sex (% female) | Age range (years) | Dysarthria type | Inclusion/exclusion criteria                                 | Inferential statistics | Power analysis | Control group | Baseline data collected | Control intervention | Number of treatment sessions | Mode of treatment delivery | Home exercise plan | Patient-reported outcomes | Treatment effect size |
|------------------------|----|---------------------------------|----------------|-------------------|-----------------|--------------------------------------------------------------|------------------------|----------------|---------------|-------------------------|----------------------|------------------------------|----------------------------|--------------------|---------------------------|-----------------------|
| de Swart et al. (2007) | 30 | Prospective; quasi-experimental | 47.00%         | 18-68             | NR              | Inclusion:<br>• DNA-proven myotonic dystrophy of adult onset | Yes                    | No             | Yes           | Yes – single baseline   | No                   | 1                            | In person, individual      | No                 | No                        | No                    |

*Note.* NR, not reported.
