# Supplementary material
Source: publisher figshare collection journal article supplement (https://asha.figshare.com/articles/dataset/_/24964473)
Supplement: Supplementary file 4 [file 1]

**Table S23**

*Multiple Sclerosis: Study Design Details and Participant Characteristics for Verbal Cueing as a Treatment Modality*

| Source                  | N  | Study design                           | Sex (% female) | Age range (years) | Dysarthria type                         | Inclusion/exclusion criteria                                                                                                                                                                       | Inferential statistics | Power analysis | Control group | Baseline data collected | Control intervention | Number of treatment sessions | Mode of treatment delivery | Home exercise plan | Patient-reported outcomes | Treatment effect size |
|-------------------------|----|----------------------------------------|----------------|-------------------|-----------------------------------------|----------------------------------------------------------------------------------------------------------------------------------------------------------------------------------------------------|------------------------|----------------|---------------|-------------------------|----------------------|------------------------------|----------------------------|--------------------|---------------------------|-----------------------|
| Tjaden & Wilding (2004) | 27 | Secondary analysis; Quasi-experimental | 59.20%         | 25-81             | Spastic Ataxic Hyperkinetic Hypokinetic | Inclusion 1,2,3,4:<br><ul style="list-style-type: none"> <li>No previous experience with LSVT</li> <li>No surgical treatment (PD participants)</li> </ul>                                          | Yes                    | No             | Yes           | Yes – single baseline   | Yes                  | 1                            | In person individual       | No                 | No                        | No                    |
| Tjaden & Wilding (2011) | 26 | Secondary analysis; Quasi-experimental | 57.60%         | 33-74             | Spastic Ataxic Hyperkinetic Hypokinetic | Inclusion 1, 2, 3, 4:<br><ul style="list-style-type: none"> <li>No previous experience with LSVT</li> <li>No surgical treatment (PD participants)</li> </ul>                                       | Yes                    | No             | Yes           | Yes – single baseline   | Yes                  | 1                            | In person individual       | No                 | No                        | No                    |
| Tjaden et al. (2013)    | 24 | Secondary analysis; Quasi-experimental | 50.00%         | 47-78             | NR                                      | Inclusion 1, 2, 4, 5:<br><ul style="list-style-type: none"> <li>Achieved at least a high school diploma</li> </ul> Exclusion:<br><ul style="list-style-type: none"> <li>Hearing aid use</li> </ul> | Yes                    | No             | Yes           | Yes – single baseline   | Yes                  | 1                            | In person individual       | No                 | No                        | No                    |
| Tjaden et al. (2014)    | 46 | Secondary analysis; Quasi-experimental | NR             | NR                | NR                                      | Inclusion 1, 5:<br><ul style="list-style-type: none"> <li>Achieved at least a high school diploma</li> </ul> Exclusion:<br><ul style="list-style-type: none"> <li>Hearing aid use</li> </ul>       | Yes                    | No             | Yes           | Yes – single baseline   | No                   | 1                            | In person individual       | No                 | No                        | No                    |

*Note.* NR, not reported. MMSE, Mini-Mental State Examination. LSVT, Lee Silverman Voice Treatment. PD, Parkinson's disease. Inclusion Criteria: <sup>1</sup>No other neurological disease than multiple sclerosis or Parkinson's disease; <sup>2</sup>Native speakers of American English; <sup>3</sup>Age-typical hearing; <sup>4</sup>Passed cognitive screen; <sup>5</sup>Normal or corrected vision.
