# Supplementary material
Source: publisher figshare collection journal article supplement (https://asha.figshare.com/articles/dataset/_/24964473)
Supplement: Supplementary file 5 [file 1]

**Table S7**

*Parkinson's disease: Study Design Details and Participant Characteristics for Verbal Cueing/Articulation Therapy/Speech Therapy as Treatment Modalities*

| Source                | N  | Study design                             | Sex (% female) | Age range (years) | Dysarthria type | Inclusion/exclusion criteria                                                                                                                                                                                                                                                                   | Inferential statistics | Power analysis | Control group | Baseline data collected | Control intervention | Number of treatment sessions         | Mode of treatment delivery | Home exercise plan | Patient-reported outcomes | Treatment effect size |
|-----------------------|----|------------------------------------------|----------------|-------------------|-----------------|------------------------------------------------------------------------------------------------------------------------------------------------------------------------------------------------------------------------------------------------------------------------------------------------|------------------------|----------------|---------------|-------------------------|----------------------|--------------------------------------|----------------------------|--------------------|---------------------------|-----------------------|
| Hsu et al. (2019)     | 11 | Secondary analysis; quasi-experimental   | 27.00%         | 62-83             | Hypokinetic     | Inclusion 2:<br><ul style="list-style-type: none"> <li>• Primary spoken language: Mandarin</li> <li>• Self-reported adequate hearing for daily communication</li> </ul>                                                                                                                        | Yes                    | No             | No            | No                      | Yes                  | 1                                    | In person, individual      | No                 | No                        | No                    |
| Martens et al. (2015) | 11 | Prospective, quasi-experimental          | 36.00%         | 52-94             | NR              | Inclusion 1:<br><ul style="list-style-type: none"> <li>• Able to commit to intensive treatment</li> <li>• Sufficient audition, vision, cognition, language and reading per clinician judgement</li> <li>• &lt;90% intelligibility</li> <li>• &gt;80% receptive prosody</li> </ul> Exclusion: 5 | Yes                    | No             | No            | Yes – single baseline   | No                   | 15 (1 session p/weekday for 3 weeks) | In person, individual      | No                 | No                        | Yes                   |
| Ramig et al. (2018)   | 64 | Prospective, randomized controlled trial | 31.50%         | 48-85             | NR              | Inclusion 1, 2, 3:<br><ul style="list-style-type: none"> <li>• Not smoked in last 4 years</li> <li>• Clinically stable on medications</li> <li>• Hoehn &amp; Yahr stages I-IV</li> <li>• Beck Depression Inventory ≤24</li> <li>• Speech/voice disorder (any severity)</li> </ul>              | Yes                    | Yes            | Yes           | Yes – single baseline   | Yes                  | 16 (4 days p/week for 4 weeks)       | In person, individual      | Yes                | Yes                       | No                    |

|                            |     |                                        |        |       |                                                                                                                                                           |                                                                                                                                                                                                                                                                                                                            |     |    |     |                       |     |                                                              |                                 |    |     |     |
|----------------------------|-----|----------------------------------------|--------|-------|-----------------------------------------------------------------------------------------------------------------------------------------------------------|----------------------------------------------------------------------------------------------------------------------------------------------------------------------------------------------------------------------------------------------------------------------------------------------------------------------------|-----|----|-----|-----------------------|-----|--------------------------------------------------------------|---------------------------------|----|-----|-----|
|                            |     |                                        |        |       |                                                                                                                                                           | Exclusion 5: <ul style="list-style-type: none"> <li>• Speech/voice disorder unrelated to PD</li> <li>• Neurosurgical treatment</li> <li>• Laryngeal surgery or pathology</li> <li>• Intensive speech treatment within 2 years</li> <li>• Previous LSVT LOUD®</li> <li>• Dysphagia requiring immediate attention</li> </ul> |     |    |     |                       |     |                                                              |                                 |    |     |     |
| Robertson & Thomsen (1984) | 18  | Prospective, quasi-experimental        | 6.00%  | 50-82 | NR                                                                                                                                                        | Exclusion: <ul style="list-style-type: none"> <li>• Any medical condition co-existing with PD</li> </ul>                                                                                                                                                                                                                   | Yes | No | Yes | Yes – single baseline | No  | 1 session p/day for 2 weeks (3.5-4 hours of treatment p/day) | In person, individual and group | No | Yes | No  |
| Sadagopan & Huber (2007)   | 14  | Prospective, quasi-experimental        | 35.70% | 51-90 | NR                                                                                                                                                        | Inclusion 2, 3: <ul style="list-style-type: none"> <li>• Living independently in the community</li> <li>• Ambulatory</li> </ul>                                                                                                                                                                                            | Yes | No | Yes | No                    | No  | 1                                                            | In person, individual           | No | No  | Yes |
| Skrabail et al. (2020)     | 51* | Prospective, quasi-experimental        | 47.00% | 49-74 | Hypokinetic<br>Spastic<br>Ataxic<br>Mixed: hypokinetic-spastic<br>Mixed: hypokinetic-ataxic<br>Mixed: hypokinetic-spastic-ataxic<br>Mixed: ataxic-spastic | NR                                                                                                                                                                                                                                                                                                                         | Yes | No | Yes | No                    | Yes | 1                                                            | In person, individual           | No | No  | No  |
| Tjaden & Wilding (2004)    | 27  | Secondary analysis; quasi-experimental | 59.20% | 25-81 | Spastic<br>Ataxic<br>Hyperkinetic<br>Hypokinetic                                                                                                          | Inclusion 2, 3, 4: <ul style="list-style-type: none"> <li>• No previous experience with LSVT</li> </ul>                                                                                                                                                                                                                    | Yes | No | Yes | Yes – single baseline | Yes | 1                                                            | In person individual            | No | No  | No  |

|                         |    |                                        |              |              |                                         |                                                                                                                                                                                            |     |    |     |                       |     |   |                      |    |    |    |  |
|-------------------------|----|----------------------------------------|--------------|--------------|-----------------------------------------|--------------------------------------------------------------------------------------------------------------------------------------------------------------------------------------------|-----|----|-----|-----------------------|-----|---|----------------------|----|----|----|--|
|                         |    |                                        |              |              |                                         | <ul style="list-style-type: none"><li>No surgical treatment (PD participants)</li></ul>                                                                                                    |     |    |     |                       |     |   |                      |    |    |    |  |
|                         |    |                                        |              |              |                                         | Exclusion: 5                                                                                                                                                                               |     |    |     |                       |     |   |                      |    |    |    |  |
| Tjaden & Wilding (2011) | 26 | Secondary analysis; quasi-experimental | 57.60%       | 33-74        | Spastic Ataxic Hyperkinetic Hypokinetic | Inclusion 2, 3, 4: <ul style="list-style-type: none"><li>No previous experience with LSVT</li><li>No surgical treatment (PD participants)</li></ul>                                        | Yes | No | Yes | Yes – single baseline | Yes | 1 | In person individual | No | No | No |  |
|                         |    |                                        |              |              |                                         | Exclusion: 5                                                                                                                                                                               |     |    |     |                       |     |   |                      |    |    |    |  |
| Tjaden & Wilding (2013) | 24 | Secondary analysis; quasi-experimental | 50.00%       | 47-78        | NR                                      | Inclusion 2: <ul style="list-style-type: none"><li>Native American English speakers</li><li>Achieved at least a high school diploma</li><li>Visual/correct ed acuity for reading</li></ul> | Yes | No | Yes | Yes – single baseline | Yes | 1 | In person individual | No | No | No |  |
|                         |    |                                        |              |              |                                         | Exclusion: 5                                                                                                                                                                               |     |    |     |                       |     |   |                      |    |    |    |  |
| Tjaden et al. (2014)    | 46 | Secondary analysis; quasi-experimental | Not reported | Not reported | NR                                      | Inclusion: <ul style="list-style-type: none"><li>Native American English speakers</li><li>Achieved at least a high school diploma</li><li>Visual/correct ed acuity for reading</li></ul>   | Yes | No | Yes | Yes – single baseline | No  | 1 | In person individual | No | No | No |  |
|                         |    |                                        |              |              |                                         | Exclusion: <ul style="list-style-type: none"><li>Hearing aid use</li></ul>                                                                                                                 |     |    |     |                       |     |   |                      |    |    |    |  |

*Note.* PD, Parkinson's disease; MMSE, Mini-Mental Status Examination. Inclusion criteria: <sup>1</sup>Diagnosis of Parkinson's disease; <sup>2</sup>Normal cognition per MMSE; <sup>3</sup>Normal hearing; <sup>4</sup>Native English speakers. Exclusion criteria: <sup>5</sup>Atypical Parkinson's disease or other neurologic comorbidity. \**n* = 17 with Parkinson's disease, *n* = 17 with multiple system atrophy, *n* = 17 with progressive supranuclear palsy, *n* = 17 healthy controls.
