# Supplementary material
Source: publisher figshare collection journal article supplement (https://asha.figshare.com/articles/dataset/_/24964473)
Supplement: Supplementary file 6 [file 1]

**Table S5.1**  
*Parkinson’s disease: PEDro Scores for the Study Describing Pitch Limiting Voice Treatment (PVLTV) as an Intervention for Dysarthria*

| Source                 | Eligibility Criteria | Random Allocation | Concealed Allocation | Participants Similar at Baseline | Blinding of Participants | Item on PEDro Scale    |                       |  | Outcomes from >85% of Participants | Intent to Treat | Between Group Comparison | Point and Variability Measures | Overall Score |
|------------------------|----------------------|-------------------|----------------------|----------------------------------|--------------------------|------------------------|-----------------------|--|------------------------------------|-----------------|--------------------------|--------------------------------|---------------|
|                        |                      |                   |                      |                                  |                          | Blinding of Therapists | Blinding of Assessors |  |                                    |                 |                          |                                |               |
| de Swart et al. (2003) | X                    |                   |                      |                                  |                          |                        |                       |  | X                                  | X               |                          |                                | 3             |

*Note.* PEDro, Physiotherapy Evidence Database. The letter ‘X’ indicates the presence of an item in a specific study; an empty cell represents the absence of an item in a specific study.
