# Supplementary material
Source: publisher figshare collection journal article supplement (https://asha.figshare.com/articles/dataset/_/24964473)
Supplement: Supplementary file 7 [file 1]

**Table S14**

*Progressive Supranuclear Palsy: Study Design Details and Participant Characteristics for LSVT LOUD® as a Treatment Modality*

| Source             | N    | Study design                    | Sex (% female) | Age range (years) | Dysarthria type | Inclusion/exclusion criteria                                                                                                                                                                                                                         | Inferential statistics | Power analysis | Control group | Baseline data collected | Control intervention | Number of treatment sessions   | Mode of treatment delivery | Home exercise plan | Patient-reported outcomes | Treatment effect size |
|--------------------|------|---------------------------------|----------------|-------------------|-----------------|------------------------------------------------------------------------------------------------------------------------------------------------------------------------------------------------------------------------------------------------------|------------------------|----------------|---------------|-------------------------|----------------------|--------------------------------|----------------------------|--------------------|---------------------------|-----------------------|
| Sale et al. (2015) | 39 * | Prospective, quasi-experimental | 31.20%         | NR                | NR              | Inclusion:<br>• Idiopathic PD or PSP<br>• Age 30-80<br>Exclusion:<br>• Unable to understand study instructions<br>• Chronic and ongoing alcohol or drug abuse<br>• Active depression, anxiety or psychosis<br>• Other atypical parkinsonian syndrome | Yes                    | No             | Yes           | Yes – single baseline   | No                   | 16 (4 days p/week for 4 weeks) | In person, individual      | Yes                | No                        | No                    |

*Note.* NR, Not Reported. PD, Parkinson's disease. PSP, Progressive supranuclear palsy. \**n* = 16 with progressive supranuclear palsy, *n* = 23 with Parkinson's disease.
