# Supplementary material
Source: publisher figshare collection journal article supplement (https://asha.figshare.com/articles/dataset/_/24964473)
Supplement: Supplementary file 8 [file 1]

**Table S26.1**  
*Myotonic Dystrophy: PEDro Scores for the Study Describing Speech Warming Up Exercises as an Intervention for Dysarthria*

| Source                 | Eligibility Criteria | Random Allocation | Concealed Allocation | Participants Similar at Baseline | Item on PEDro Scale      |                        |                       | Outcomes from >85% of Participants | Intent to Treat | Between Group Comparison | Point and Variability Measures | Overall Score |
|------------------------|----------------------|-------------------|----------------------|----------------------------------|--------------------------|------------------------|-----------------------|------------------------------------|-----------------|--------------------------|--------------------------------|---------------|
|                        |                      |                   |                      |                                  | Blinding of Participants | Blinding of Therapists | Blinding of Assessors |                                    |                 |                          |                                |               |
| de Swart et al. (2007) |                      |                   |                      |                                  |                          |                        |                       | X                                  | X               | X                        | X                              | 4             |

*Note.* PEDro, Physiotherapy Evidence Database. The letter ‘X’ indicates the presence of an item in a specific study; an empty cell represents the absence of an item in a specific study.
