# Supplementary material
Source: publisher figshare collection journal article supplement (https://asha.figshare.com/articles/dataset/_/24964473)
Supplement: Supplementary file 9 [file 1]

**Table S16.1**

*Progressive Supranuclear Palsy: PEDro Scores for Studies Describing Singing as an Intervention for Dysarthria*

| Source                | Item on PEDro Scale  |                   |                      |                                  |                          |                        |                       |                                    |                 |                          |                                | Overall Score |
|-----------------------|----------------------|-------------------|----------------------|----------------------------------|--------------------------|------------------------|-----------------------|------------------------------------|-----------------|--------------------------|--------------------------------|---------------|
|                       | Eligibility Criteria | Random Allocation | Concealed Allocation | Participants Similar at Baseline | Blinding of Participants | Blinding of Therapists | Blinding of Assessors | Outcomes from >85% of Participants | Intent to Treat | Between Group Comparison | Point and Variability Measures |               |
| Tamplin et al. (2019) | X                    |                   |                      |                                  |                          |                        |                       | X                                  |                 | X                        | X                              | 4             |
| Tamplin et al. (2020) | X                    |                   |                      |                                  |                          |                        |                       | X                                  |                 | X                        | X                              | 4             |

**Note.** PEDro, Physiotherapy Evidence Database. The letter 'X' indicates the presence of an item in a specific study; an empty cell represents the absence of an item in a specific study.
