# Supplementary material
Source: publisher figshare collection journal article supplement (https://asha.figshare.com/articles/dataset/_/24964473)
Supplement: Supplementary file 10 [file 1]

**Table S9.1**

*Parkinson's disease: PEDro Scores for Studies Describing Masking Noise/SpeechVive™ as an Intervention for Dysarthria*

| Source                     | Item on PEDro Scale  |                   |                      |                                  |                          |                        |                       |                                    |                 |                          |                                | Overall Score |
|----------------------------|----------------------|-------------------|----------------------|----------------------------------|--------------------------|------------------------|-----------------------|------------------------------------|-----------------|--------------------------|--------------------------------|---------------|
|                            | Eligibility Criteria | Random Allocation | Concealed Allocation | Participants Similar at Baseline | Blinding of Participants | Blinding of Therapists | Blinding of Assessors | Outcomes from >85% of Participants | Intent to Treat | Between Group Comparison | Point and Variability Measures |               |
| Coutinho et al. (2009)     | X                    |                   |                      |                                  |                          |                        |                       | X                                  | X               | X                        | X                              | 5             |
| Quedas et al. (2007)       |                      |                   |                      |                                  |                          |                        |                       | X                                  | X               | X                        |                                | 3             |
| Richards et al. (2014)     |                      |                   |                      |                                  |                          |                        | X                     | X                                  | X               |                          | X                              | 4             |
| Sadagopan & Huber (2007)   | X                    | X                 |                      |                                  |                          |                        |                       | X                                  | X               | X                        | X                              | 6             |
| Stathopoulos et al. (2014) |                      |                   |                      |                                  |                          |                        |                       | X                                  | X               |                          | X                              | 3             |

**Note.** PEDro, Physiotherapy Evidence Database. The letter 'X' indicates the presence of an item in a specific study; an empty cell represents the absence of an item in a specific study.
