# Supplementary material
Source: publisher figshare collection journal article supplement (https://asha.figshare.com/articles/dataset/_/24964473)
Supplement: Supplementary file 12 [file 1]

**Table S2.2**

*Parkinson's disease: Findings Summarizing the Benefit of Lee Silverman Voice Treatment LOUD® (LSVT LOUD®)/LSVT® Extended (LSVT-X)/LSVT® Companion™ on Vocal Intensity*

| Elicitation task     | Average post-treatment intensity increase | Reference(s)                              |
|----------------------|-------------------------------------------|-------------------------------------------|
| Sustained phonation  | 6.5 – 18.0 dB                             | 1 – 22                                    |
| Syllable repetition  | 6.5 dB                                    | 13                                        |
| Phrase repetition    | 2.3 – 11.2 dB                             | 14, 20, 23                                |
| Reading aloud        | 3.4 – 31.0 dB                             | 3 – 14, 16 – 22, 24 – 27                  |
| Monologue            | 2.5 – 12.8 dB                             | 5, 6, 8 – 13, 16, 18, 19, 22, 24 – 26, 28 |
| Conversation         | 4.1 – 6.1 dB                              | 4, 7, 17                                  |
| Verbal fluency tasks | 3.3 – 8.3 dB                              | 4, 5, 16                                  |

*Note.* <sup>1</sup>Cannito et al. (2012); <sup>2</sup>de Azevedo et al. (2015); <sup>3</sup>El Sharkawi et al. (2002); <sup>4</sup>Griffin et al. (2018); <sup>5</sup>Halpern et al. (2012); <sup>6</sup>Moya-Gale et al. (2018); <sup>7</sup>Narayana et al. (2010); <sup>8</sup>Ramig et al. (1995); <sup>9</sup>Ramig et al., (1996); <sup>10</sup>Ramig et al., (2018); <sup>11</sup>Ramig, Sapir, Countryman, et al. (2001); <sup>12</sup>Ramig, Sapir, Fox, et al. (2001); <sup>13</sup>Ramig & Dromey (1996); <sup>14</sup>Sale et al. (2015); <sup>15</sup>Sapir et al. (2007); <sup>16</sup>Sauvageau et al. (2015); <sup>17</sup>Spielman et al. (2007); <sup>18</sup>Theodoros et al. (2006); <sup>19</sup>Theodoros et al. (2016); <sup>20</sup>Traverse (2016); <sup>21</sup>Tripoliti et al. (2011); <sup>22</sup>Wight & Miller (2015); <sup>23</sup>Huber et al., (2003); <sup>24</sup>Constantinescu et al. (2011); <sup>25</sup>Nakayama et al. (2020); <sup>26</sup>Searl et al. (2011); <sup>27</sup>Wohlert (2004); <sup>28</sup>Körner Gustafsson et al. (2019).
