# Supplementary material
Source: publisher figshare collection journal article supplement (https://asha.figshare.com/articles/dataset/_/24964473)
Supplement: Supplementary file 14 [file 1]

**Table S2**

*Parkinson's disease: Study Design Details and Participant Characteristics for Lee Silverman Voice Treatment LOUD (LSVT LOUD®)/LSVT® Extended (LSVT-X®)/LSVT® Companion™ as Treatment Modalities*

| Source                       | N  | Study design                             | Sex (% female) | Age range (years) | Dysarthria type | Inclusion/exclusion criteria                                                                                              | Inferential statistics | Power analysis | Control group | Baseline data collected  | Control intervention  | Number of treatment sessions   | Mode of treatment delivery | Home exercise plan | Patient-reported outcomes | Treatment effect size |
|------------------------------|----|------------------------------------------|----------------|-------------------|-----------------|---------------------------------------------------------------------------------------------------------------------------|------------------------|----------------|---------------|--------------------------|-----------------------|--------------------------------|----------------------------|--------------------|---------------------------|-----------------------|
| Alharbi et al. (2019)        | 8  | Prospective; quasi-experimental          | 33.00%         | 52-81             | Hypokinetic     | Inclusion:<br>• No previous speech or voice therapy<br>Exclusion:<br>• > mild depression<br>• > mild cognitive impairment | Yes                    | No             | No            | Yes – single baseline    | No                    | 16 (4 days p/week for 4 weeks) | In person, individual      | Yes                | No                        | No                    |
| Baumann et al. (2018)        | 11 | Prospective; quasi-experimental          | 36.30%         | 55-74             | Hypokinetic     | Inclusion: 1, 2<br>• No history of speech problems, neurological, vascular, or psychiatric disease (controls)             | Yes                    | No             | Yes           | Yes – single baseline    | Yes – normal loudness | 16 (4 days p/week for 4 weeks) | In person, individual      | Yes                | No                        | No                    |
| Baumgartner et al. (2001)    | 20 | Prospective, quasi-experimental          | 25.00%         | Mean = 66         | NR              | Inclusion: 1<br>Sought treatment for voice/speech problems associated with PD                                             | Yes                    | No             | No            | Yes – single baseline    | No                    | 16 (4 days p/week for 4 weeks) | In person, individual      | No                 | No                        | No                    |
| Cannito et al. (2012)        | 8  | Prospective, quasi-experimental          | 37.50%         | 52-81             | Hypokinetic     | Inclusion: 1, 2<br>• No current speech treatment<br>No pre-existing vocal fold pathology                                  | Yes                    | No             | No            | Yes – multiple baselines | Yes                   | 16 (4 days p/week for 4 weeks) | In person, individual      | No                 | No                        | No                    |
| Constantinescu et al. (2011) | 34 | Prospective, randomized controlled trial | 21.00%         | 54-85             | Hypokinetic     | Inclusion: 2<br>• Vocal fold structure and movement consistent with PD<br>• Stimulable for                                | Yes                    | Yes            | Yes           | Yes – single baseline    | No                    | 16 (4 days p/week for 4 weeks) | In person, individual      | Yes                | Yes                       | No                    |

|                          |    |                                 |        |       |    |                                                                                                                                                                                                                                                                                                                                          |     |    |    |                       |     |                                |                          |     |     |    |    |
|--------------------------|----|---------------------------------|--------|-------|----|------------------------------------------------------------------------------------------------------------------------------------------------------------------------------------------------------------------------------------------------------------------------------------------------------------------------------------------|-----|----|----|-----------------------|-----|--------------------------------|--------------------------|-----|-----|----|----|
|                          |    |                                 |        |       |    | increased loudness                                                                                                                                                                                                                                                                                                                       |     |    |    |                       |     |                                |                          |     |     |    |    |
|                          |    |                                 |        |       |    | <ul style="list-style-type: none"> <li>Stable medications</li> </ul> Exclusion: 2, 3, 7 <ul style="list-style-type: none"> <li>Unable to give informed consent due to cognition</li> <li>Severe, uncorrected visual/auditory disturbance</li> <li>History of alcohol abuse</li> </ul> Participation in LSVT LOUD® in the prior 12 months |     |    |    |                       |     |                                |                          |     |     |    |    |
| de Azevedo et al. (2015) | 10 | Prospective, quasi-experimental | 50.00% | 59-88 | NR | Inclusion: 1 <ul style="list-style-type: none"> <li>Levodopa-replacement medication</li> </ul> Hoehn and Yahr stages 2-3                                                                                                                                                                                                                 | Yes | No | No | Yes – single baseline | Yes | 16 (2 days p/week for 8 weeks) | In person, individual    | No  | No  | No | No |
| Dias et al. (2016)       | 20 | Prospective, quasi-experimental | 15.00% | 42-78 | NR | Inclusion: 1 <ul style="list-style-type: none"> <li>Stages 2-4 per Hoehn &amp; Yahr scale</li> <li>Voice complaints</li> <li>Access to a computer with headset microphone, camera and internet</li> </ul> Exclusion: 5 <ul style="list-style-type: none"> <li>Cognitive decline</li> <li>Aphasia</li> </ul> Receiving speech therapy     | Yes | No | No | Yes – single baseline | No  | 16 (2 days p/week for 8 weeks) | Telepractice, individual | No  | Yes | No | No |
| El Sharkawi et           | 8  | Prospective, quasi-experimental | 25.00% | 57-77 | NR | Inclusion: 1<br>Exclusion: 2                                                                                                                                                                                                                                                                                                             | Yes | No | No | Yes – single baseline | No  | 16 (4 days p/week for 4 weeks) | In person, individual    | Yes | Yes | No | No |

|                                 |    |                                               |              |             |             |                                                                                                                                                                                                          |     |     |     |                          |     |                                 |                                      |     |     |     |
|---------------------------------|----|-----------------------------------------------|--------------|-------------|-------------|----------------------------------------------------------------------------------------------------------------------------------------------------------------------------------------------------------|-----|-----|-----|--------------------------|-----|---------------------------------|--------------------------------------|-----|-----|-----|
| al.<br>(2002)                   |    |                                               |              |             |             | History of gastro-intestinal disease, gastro-esophageal surgery, head and neck cancer                                                                                                                    |     |     |     |                          |     |                                 |                                      |     |     |     |
| Griffin et al. (2018)           | 29 | Prospective, quasi-experimental               | Not reported | Mean = 68   | Hypokinetic | NR                                                                                                                                                                                                       | Yes | No  | Yes | Yes – single baseline    | Yes | 16 (4 days p/week for 4 weeks)  | Telepractice, individual             | Yes | No  | No  |
| Halpern et al. (2012)           | 16 | Prospective, quasi-experimental               | 50.00%       | 54-81       | NR          | Inclusion: 1<br>Exclusion: 1<br>• Depression<br>History of neurosurgery, head and neck cancer, gastro-intestinal disease or surgery, smoking                                                             | Yes | No  | Yes | Yes – multiple baselines | Yes | 16 (4 days p/week for 4 weeks)  | In person, individual                | Yes | Yes | No  |
| Howell et al. (2009)            | 3  | Prospective/retrospective, quasi-experimental | 0.00%        | 63-72       | Hypokinetic | Inclusion:<br>• Familiar with Microsoft Windows applications<br>Have a computer operating Windows XP, broadband internet, webcam, headset and microphone, Windows Media Player, Skype and email accounts | Yes | No  | Yes | Yes – multiple baselines | Yes | 16 (4 days p/week for 4 weeks)  | In person + telepractice, individual | Yes | No  | No  |
| Huber et al. (2003)             | 6  | Prospective, quasi-experimental               | 17.00%       | 63-78       | NR          | Inclusion: 1                                                                                                                                                                                             | Yes | No  | Yes | Yes – multiple baselines | Yes | 16 (4 days p/week for 4 weeks)  | In person, individual                | Yes | No  | No  |
| Körner Gustafsson et al. (2019) | 2  | Prospective, single-subject                   | 0%           | 51          | NR          | NR                                                                                                                                                                                                       | Yes | No  | Yes | Yes – multiple baselines | No  | 4 weeks – not further specified | In person, individual                | Yes | Yes | No  |
| Levy et al. (2020)              | 57 | Prospective, randomized controlled trial      | 28.00%       | Mean = 66.5 | Hypokinetic | Inclusion: 1<br>• Stable medications                                                                                                                                                                     | Yes | Yes | Yes | Yes – single baseline    | Yes | 16 (4 days p/week for 4 weeks)  | In person, individual                | Yes | No  | Yes |

| Author (Year)           | N  | Study Design                          | Prevalence | Age     | Motor       | Inclusion/Exclusion                                                                                                                              | Speech | Language | Memory | Executive                | Baseline | Other | Intervention                                 | Setting               | Blind | Follow-up | Dropouts |
|-------------------------|----|---------------------------------------|------------|---------|-------------|--------------------------------------------------------------------------------------------------------------------------------------------------|--------|----------|--------|--------------------------|----------|-------|----------------------------------------------|-----------------------|-------|-----------|----------|
| Manor et al. (2005)     | 8  | Prospective, quasi-experimental study | 13.00%     | 55-84   | NR          | Inclusion: 1<br>Exclusion: 1                                                                                                                     | Yes    | No       | No     | Yes – single baseline    | No       |       | 8 (1 x 75 minute session p/week for 8 weeks) | In person, group      | Yes   | Yes       | No       |
| Moya-Gale et al. (2018) | 15 | Prospective, quasi-experimental       | 33.00%     | 58-82   | Hypokinetic | Inclusion:<br>• No history of speech/language problems prior to PD<br>• Native Castilian Spanish speakers<br>• MMSE score ≥25/30<br>Exclusion: 5 | Yes    | No       | No     | Yes – multiple baselines | N/A      |       | 16 (4 days p/week for 4 weeks)               | In person, individual | Yes   | Yes       | No       |
| Nakayama et al. (2020)  | 21 | Prospective; quasi-experimental       | 61.50%     | 64 - 69 | NR          | Inclusion:<br>• Possible PD per the MDS criteria<br>Exclusion: 1, 4, 7<br>• Cerebrovascular disease that could                                   | Yes    | No       | No     | Yes – single baseline    | No       |       | 16 (4 days p/week for 4 weeks)               | In person, individual | Yes   | No        | No       |

|                        |    |                                        |              |              |    |                                                                                                                                                                                                                      |     |    |     |                          |     |                                |                       |     |     |    |    |
|------------------------|----|----------------------------------------|--------------|--------------|----|----------------------------------------------------------------------------------------------------------------------------------------------------------------------------------------------------------------------|-----|----|-----|--------------------------|-----|--------------------------------|-----------------------|-----|-----|----|----|
|                        |    |                                        |              |              |    | result in<br>dysarthria                                                                                                                                                                                              |     |    |     |                          |     |                                |                       |     |     |    |    |
| Narayana et al. (2010) | 10 | Prospective, quasi-experimental        | 25.00%       | Mean = 60    | NR | Inclusion: 1, 2<br>• Stimulable for increased loudness<br>• Levodopa therapy<br>Exclusion: 7                                                                                                                         | Yes | No | No  | Yes – single baseline    | No  | Not reported                   | Not reported          | No  | No  | No | No |
| Ramig & Dromey (1996)  | 17 | Secondary analysis, quasi-experimental | 12.00%       | 49-79        | NR | Post-hoc exclusion:<br>• Extraneous movements (tremor, dyskinesia) and/or inability to perform syllable repetition<br>• Minimum flow offset <0.75 L/s<br>• Poor quality flow/pressure data                           | Yes | No | Yes | Yes – single baseline    | Yes | 16 (4 days p/week for 4 weeks) | In person, individual | Yes | No  | No | No |
| Ramig et al. (1995)    | 45 | Prospective, quasi-experimental        | 27.00%       | 32-83        | NR | Inclusion:<br>• Residents of Denver, Colorado<br>Exclusion: 6<br>• PD etiology other than idiopathic<br>Post-hoc exclusion:<br>• Lack of compliance with pre- and post-treatment assessments and treatment protocols | Yes | No | Yes | Yes – single baseline    | Yes | 16 (4 days p/week for 4 weeks) | In person, individual | Yes | Yes | No | No |
| Ramig et al. (1996)    | 35 | Prospective, quasi-experimental        | Not reported | Not reported | NR | Exclusion: 6                                                                                                                                                                                                         | Yes | No | Yes | Yes – single baseline    | Yes | 16 (4 days p/week for 4 weeks) | In person, individual | Yes | Yes | No | No |
| Ramig et al. (2001a)   | 29 | Prospective, quasi-experimental        | 50.00%       | Mean = 67.9  | NR | NR                                                                                                                                                                                                                   | Yes | No | Yes | Yes – multiple baselines | Yes | 16 (4 days p/week for 4 weeks) | In person, individual | No  | No  | No | No |

|                       |    |                                          |        |               |    |                                                                                                                                                                                                                                                                                                                                                                                                                                                                                                                                  |     |     |     |                       |     |                                |                       |     |     |    |
|-----------------------|----|------------------------------------------|--------|---------------|----|----------------------------------------------------------------------------------------------------------------------------------------------------------------------------------------------------------------------------------------------------------------------------------------------------------------------------------------------------------------------------------------------------------------------------------------------------------------------------------------------------------------------------------|-----|-----|-----|-----------------------|-----|--------------------------------|-----------------------|-----|-----|----|
| Ramig et al. (2001b)  | 29 | Prospective, quasi-experimental          | 19.00% | Mean = 61.3   | NR | NR                                                                                                                                                                                                                                                                                                                                                                                                                                                                                                                               | Yes | No  | Yes | Yes – single baseline | Yes | 16 (4 days p/week for 4 weeks) | In person, individual | No  | No  | No |
| Ramig et al. (2018)   | 64 | Prospective, randomized controlled trial | 31.50% | 48-85         | NR | Inclusion: 1, 3 <ul style="list-style-type: none"> <li>• Not smoked in last 4 years</li> <li>• Clinically stable on medications</li> <li>• Hoehn &amp; Yahr stages 1-4</li> <li>• MMSE <math>\geq 25</math></li> <li>• Beck Depression Inventory <math>\leq 24</math></li> <li>• Any severity of speech and voice disorder</li> </ul> Exclusion: 2, 3, 5, 7 <ul style="list-style-type: none"> <li>• Intensive speech treatment within 2 years</li> <li>• Previous LSVT LOUD® Dysphagia requiring immediate attention</li> </ul> | Yes | Yes | Yes | Yes – single baseline | Yes | 16 (4 days p/week for 4 weeks) | In person, individual | Yes | Yes | No |
| Sackley et al. (2018) | 89 | Prospective, quasi-experimental          | 22.00% | Mean age = 67 | NR | Inclusion: 1 <ul style="list-style-type: none"> <li>• Patient- or carer-reported problems with speech</li> </ul> Exclusion: 1, 7 <ul style="list-style-type: none"> <li>• Speech-language therapy for speech-related problems in the past 2 years</li> </ul>                                                                                                                                                                                                                                                                     | No  | Yes | Yes | Yes – single baseline | Yes | 16 (4 days p/week for 4 weeks) | In person, individual | Yes | Yes | No |

|                                   |          |                                        |        |                 |    |                                                                                                                                                                                                                                                                                                                                                                         |     |     |     |                             |     |                                      |                          |     |     |     |  |
|-----------------------------------|----------|----------------------------------------|--------|-----------------|----|-------------------------------------------------------------------------------------------------------------------------------------------------------------------------------------------------------------------------------------------------------------------------------------------------------------------------------------------------------------------------|-----|-----|-----|-----------------------------|-----|--------------------------------------|--------------------------|-----|-----|-----|--|
|                                   |          |                                        |        |                 |    | Investigator's<br>view that<br>speech-<br>language<br>therapy was<br>not indicated                                                                                                                                                                                                                                                                                      |     |     |     |                             |     |                                      |                          |     |     |     |  |
| Sale et<br>al.<br>(2015)          | 39<br>** | Prospective,<br>quasi-<br>experimental | 31.20% | Not<br>reported | NR | Inclusion:<br>• Idiopathic<br>PD or PSP<br><br>• Age 30-80<br>Exclusion:<br>• Unable to<br>understand<br>study<br>instructions<br><br>• Chronic and<br>ongoing<br>alcohol or<br>drug abuse<br><br>• Active<br>depression,<br>anxiety or<br>psychosis<br>Other atypical<br>parkinsonian<br>syndrome                                                                      | Yes | No  | Yes | Yes –<br>single<br>baseline | No  | 16 (4 days<br>p/week for 4<br>weeks) | In person,<br>individual | Yes | No  | No  |  |
| Saffari<br>an et<br>al.<br>(2019) | 23       | Prospective;<br>quasi-<br>experimental | 52.00% | Not<br>reported | NR | Inclusion: 3<br>• H&Y stage<br>1-2<br><br>• Diagnosed<br>with PD 1-8<br>years prior<br>• Levodopa-<br>replacement<br>therapy; no<br>medication<br>changes<br>during study<br>• Monolingual<br>native<br>Persian<br>speakers<br>• Right-<br>handed<br>• Voice or<br>speech<br>concerns<br>Exclusion: 5, 7<br>• History of<br>stroke, head<br>trauma,<br>brain<br>surgery | Yes | Yes | Yes | Yes -<br>single<br>baseline | Yes | 16 (4 days<br>p/week for 4<br>weeks) | In person,<br>individual | Yes | Yes | Yes |  |

|                         |    |                                               |        |              |             |                                                                                                                                                                                                                                                                                                                                                                                                                                                   |     |    |     |                          |     |                                              |                       |     |     |     |  |
|-------------------------|----|-----------------------------------------------|--------|--------------|-------------|---------------------------------------------------------------------------------------------------------------------------------------------------------------------------------------------------------------------------------------------------------------------------------------------------------------------------------------------------------------------------------------------------------------------------------------------------|-----|----|-----|--------------------------|-----|----------------------------------------------|-----------------------|-----|-----|-----|--|
|                         |    |                                               |        |              |             | <ul style="list-style-type: none"><li>• Depression severity &gt;10 per the GDS</li><li>MMSE &lt; 26</li></ul>                                                                                                                                                                                                                                                                                                                                     |     |    |     |                          |     |                                              |                       |     |     |     |  |
| Sapir et al. (2007)     | 29 | Prospective, quasi-experimental               | 51.70% | Not reported | NR          | Not reported                                                                                                                                                                                                                                                                                                                                                                                                                                      | Yes | No | Yes | Yes – multiple baselines | Yes | 16 (4 days p/week for 4 weeks)               | In person, individual | Yes | No  | Yes |  |
| Sapir et al. (2002)     | 35 | Prospective, quasi-experimental               | NR     | NR           | NR          | Exclusion: 6                                                                                                                                                                                                                                                                                                                                                                                                                                      | Yes | No | Yes | Yes – single baseline    | Yes | 16 (4 days p/week for 4 weeks)               | In person, individual | No  | No  | No  |  |
| Sauvageau et al. (2015) | 9  | Prospective, quasi-experimental               | 11.10% | 58-75        | Hypokinetic | Not reported                                                                                                                                                                                                                                                                                                                                                                                                                                      | Yes | No | No  | Yes – multiple baselines | No  | 16 (4 days p/week for 4 weeks)               | In person, individual | No  | No  | No  |  |
| Searl et al. (2011)     | 15 | Prospective, quasi-experimental               | 40.00% | 44-83        | NR          | Inclusion: 1 <ul style="list-style-type: none"><li>• &gt;18 years old</li><li>• Physically/cognitively able to participate in weekly 90 minute sessions</li><li>• Understand American English</li><li>• Optimal pharmacological management of PD</li></ul> Exclusion: 3, 4, 6 <ul style="list-style-type: none"><li>• Previous history that may have altered speech production</li></ul> Previous LSVT or other speech therapy targeting loudness | Yes | No | No  | Yes – single baseline    | No  | 8 (1 x 90 minute session p/week for 8 weeks) | In person, group      | Yes | Yes | Yes |  |
| Spielman et al. (2007)  | 15 | Prospective-retrospective, quasi-experimental | 25.00% | 45-82        | NR          | Exclusion: 7<br>High-effort voice therapy contraindicated                                                                                                                                                                                                                                                                                                                                                                                         | Yes | No | Yes | Yes – multiple baselines | Yes | 16 (2 days p/week for 8 weeks)               | In person, individual | Yes | Yes | No  |  |
| Spielman et             | 12 | Prospective, quasi-experimental               | 50.00% | 50-84        | NR          | Exclusion: 1, 4, 7                                                                                                                                                                                                                                                                                                                                                                                                                                | Yes | No | Yes | Yes – multiple baselines | Yes | 16 (4 days p/week for 4 weeks)               | In person, individual | Yes | Yes | No  |  |



|                            |    |                                          |        |               |             |                                                                                                                                                                                                                                                                                                                                                |     |     |     |                          |     |                                |                                                                 |     |     |    |  |
|----------------------------|----|------------------------------------------|--------|---------------|-------------|------------------------------------------------------------------------------------------------------------------------------------------------------------------------------------------------------------------------------------------------------------------------------------------------------------------------------------------------|-----|-----|-----|--------------------------|-----|--------------------------------|-----------------------------------------------------------------|-----|-----|----|--|
| al.<br>(2011)              |    |                                          |        |               |             | <ul style="list-style-type: none"><li>• Participation in external speech/voice therapy during the 6 month follow-up period (treatment group) or entire study (control group)</li><li>• Severe untreated depression</li></ul> Neurological illness or complication from STN-DBS surgery                                                         |     |     |     |                          |     |                                |                                                                 |     |     |    |  |
| Theodoros et al.<br>(2006) | 10 | Prospective, quasi-experimental          | 20.00% | Mean age = 73 | Hypokinetic | Exclusion: 1, 2, 7 <ul style="list-style-type: none"><li>• History of other speech disturbance</li><li>• History of alcohol abuse</li></ul>                                                                                                                                                                                                    | Yes | No  | No  | Yes – single baseline    | No  | 16 (4 days p/week for 4 weeks) | Telepractice, individual                                        | Yes | No  | No |  |
| Theodoros et al.<br>(2016) | 52 | Prospective, randomized controlled trial | 30.80% | 50-87         | Hypokinetic | Inclusion: 1, 2 <ul style="list-style-type: none"><li>• Age 18-89</li><li>• PD severity between 1-5 on the modified Hoehn &amp; Yahr scale</li><li>• English speaking</li><li>• Adequate cognition to participate in assessment and treatment</li><li>• Stimulable for loud speech</li><li>• Vocal structure and function consistent</li></ul> | Yes | Yes | Yes | Yes – multiple baselines | Yes | 16 (4 days p/week for 4 weeks) | In person (control) and telepractice (experimental), individual | Yes | Yes | No |  |

|                         |    |                                 |        |       |             |                                                                                                                                                                                                                                           |     |    |     |                       |     |                                |                       |     |     |    |  |
|-------------------------|----|---------------------------------|--------|-------|-------------|-------------------------------------------------------------------------------------------------------------------------------------------------------------------------------------------------------------------------------------------|-----|----|-----|-----------------------|-----|--------------------------------|-----------------------|-----|-----|----|--|
|                         |    |                                 |        |       |             | with PD per ENT evaluation                                                                                                                                                                                                                |     |    |     |                       |     |                                |                       |     |     |    |  |
|                         |    |                                 |        |       |             | <ul style="list-style-type: none"><li>• Stable medications</li></ul> Exclusion: 1, 2, 3, 7                                                                                                                                                |     |    |     |                       |     |                                |                       |     |     |    |  |
|                         |    |                                 |        |       |             | <ul style="list-style-type: none"><li>• History of alcohol abuse</li><li>• Inadequately aided vision or hearing for videoconferencing</li><li>• Previously completed LSVT LOUD®</li></ul>                                                 |     |    |     |                       |     |                                |                       |     |     |    |  |
| Traverse (2016)         | 9  | Prospective, quasi-experimental | 55.60% | 67-77 | Hypokinetic | Inclusion: <ul style="list-style-type: none"><li>• Membership at a Parkinson's health group</li><li>• Possession of a disability card</li><li>• No more than mild cognitive changes</li><li>• Able to attend in-person sessions</li></ul> | Yes | No | No  | Yes – single baseline | No  | 12 (3 days p/week for 4 weeks) | In person, group      | Yes | Yes | No |  |
| Tripoliti et al. (2011) | 20 | Prospective, quasi-experimental | NR     | NR    | Hypokinetic | Inclusion: <ul style="list-style-type: none"><li>• PD either treated with deep brain stimulation of the subthalamic nucleus, or medically treated only</li></ul>                                                                          | Yes | No | Yes | Yes – single baseline | Yes | 16 (4 days p/week for 4 weeks) | In person, individual | No  | No  | No |  |
| Whitehill et al. (2011) | 12 | Prospective, quasi-experimental | 58.30% | 56-78 | Hypokinetic | Inclusion: 3 <ul style="list-style-type: none"><li>• Normal oral-peripheral structures</li><li>• No aphasia or apraxia of</li></ul>                                                                                                       | Yes | No | No  | Yes – single baseline | No  | 16 (4 days p/week for 4 weeks) | In person, individual | No  | No  | No |  |

|                       |      |                                   |        |       |             |                                                                                                                                                                                                                                                                            |     |    |     |                       |     |                                                                                                                                                                                           |                       |     |     |     |  |
|-----------------------|------|-----------------------------------|--------|-------|-------------|----------------------------------------------------------------------------------------------------------------------------------------------------------------------------------------------------------------------------------------------------------------------------|-----|----|-----|-----------------------|-----|-------------------------------------------------------------------------------------------------------------------------------------------------------------------------------------------|-----------------------|-----|-----|-----|--|
|                       |      |                                   |        |       |             | speech per the Cantonese Aphasia Battery                                                                                                                                                                                                                                   |     |    |     |                       |     |                                                                                                                                                                                           |                       |     |     |     |  |
| Wohler t (2004)       | 11 * | Prospective, quasi-experimental   | 18.20% | 53-85 | Hypokinetic | Inclusion: 2<br>• MMSE ≥ 26/30                                                                                                                                                                                                                                             | No  | No | Yes | Yes – single baseline | Yes | 16. Participants assigned to one of three treatment schedules:<br>1) 4 days p/week for 4 weeks, 2) 2 days p/week for 8 weeks, 3) 2 days p/week for 4 weeks + additional homework sessions | In person, individual | Yes | No  | No  |  |
| Wight & Miller (2015) | 33   | Retrospective, quasi-experimental | 21.20% | 48-82 | NR          | Inclusion: 1, 2<br>• Self-reported effects of speech disorder on communicative effectiveness<br>• Stimulable for louder speech<br>Exclusion: 2<br>• Voice intensity not deemed to be a problem by clinician/patient<br>• History of speech/language impairment prior to PD | Yes | No | No  | Yes – single baseline | No  | 16 (4 days p/week for 4 weeks)                                                                                                                                                            | In person, individual | Yes | Yes | Yes |  |

*Note.* NR, not reported. PD, Parkinson's disease; MDS, Movement Disorders Society; H&Y, Hoehn & Yahr Scale; DBS, deep brain stimulation; GDS, Geriatric depression scale; MMSE, Mini-mental state examination; ORL, otorhinolaryngologist; STN-DBS, sub-

thalamus deep brain stimulation. ENT; ear-nose-throat surgeon/otorhinolaryngologist. Inclusion criteria: <sup>1</sup>Diagnosis of PD; <sup>2</sup>Presence of hypokinetic dysarthria; <sup>3</sup>Age-typical hearing or corrected hearing. Exclusion Criteria: <sup>1</sup>Dementia; <sup>2</sup>Neurological diagnoses other than PD; <sup>3</sup>Disorders of speech and/or language unrelated to PD; <sup>4</sup>Hearing impairment; <sup>5</sup>Non-pharmacological treatments for PD (e.g., deep-brain stimulation); <sup>6</sup>Laryngeal pathology that contraindicated speech and voice therapy; <sup>7</sup>History of laryngeal disorders, surgery, or damage and/or respiratory/laryngeal dysfunction unrelated to PD. \*Initially enrolled 20 participants; analysis completed on 11 participants. \*\* $n = 23$  with Parkinson's disease,  $n = 16$  with progressive supranuclear palsy.
