# Supplementary material
Source: publisher figshare collection journal article supplement (https://asha.figshare.com/articles/dataset/_/24964473)
Supplement: Supplementary file 16 [file 1]

**Table S6.1**

*Parkinson's disease: PEDro Scores for Studies Describing Music Therapy/Singing as an Intervention for Dysarthria*

| Source                       | Eligibility Criteria | Random Allocation | Concealed Allocation | Participants Similar at Baseline | Item on PEDro Scale      |                        |                       | Outcomes from >85% of Participants | Intent to Treat | Between Group Comparison | Point and Variability Measures | Overall Score |
|------------------------------|----------------------|-------------------|----------------------|----------------------------------|--------------------------|------------------------|-----------------------|------------------------------------|-----------------|--------------------------|--------------------------------|---------------|
|                              |                      |                   |                      |                                  | Blinding of Participants | Blinding of Therapists | Blinding of Assessors |                                    |                 |                          |                                |               |
| Azekawa et al. (2018)        | X                    |                   |                      |                                  |                          |                        |                       |                                    | X               |                          | X                              | 3             |
| Di Benedetto et al. (2009)   | X                    |                   |                      |                                  |                          |                        | X                     | X                                  | X               |                          | X                              | 5             |
| Elefant et al. (2012)        |                      |                   |                      |                                  |                          |                        |                       | X                                  | X               |                          | X                              | 3             |
| Evans et al. (2012)          |                      |                   |                      |                                  |                          |                        |                       |                                    |                 |                          | X                              | 1             |
| Haneishi (2001)              | X                    |                   |                      |                                  |                          |                        |                       | X                                  | X               |                          | X                              | 4             |
| Higgins & Richards on (2019) | X                    |                   |                      |                                  |                          |                        |                       | X                                  | X               |                          | X                              | 4             |
| Shih et al. (2012)           | X                    |                   |                      |                                  |                          | X                      |                       | X                                  |                 |                          | X                              | 4             |
| Tamplin et al. (2019)        | X                    |                   |                      |                                  |                          |                        |                       | X                                  |                 | X                        | X                              | 4             |
| Tamplin et al. (2020)        | X                    |                   |                      |                                  |                          |                        |                       | X                                  |                 | X                        | X                              | 4             |
| Tanner et al. (2016)         | X                    |                   |                      |                                  |                          |                        |                       | X                                  |                 |                          | X                              | 3             |
| Yinger & Lapointe (2012)     | X                    |                   |                      |                                  |                          |                        |                       | X                                  | X               | X                        | X                              | 5             |

*Note.* PEDro, Physiotherapy Evidence Database. The letter 'X' indicates the presence of an item in a specific study; an empty cell represents the absence of an item in a specific study.
