# Supplementary material
Source: publisher figshare collection journal article supplement (https://asha.figshare.com/articles/dataset/_/24964473)
Supplement: Supplementary file 17 [file 1]

**Table S15.1**  
*Progressive Supranuclear Palsy: PEDro Scores for the Study Describing Verbal Cueing as an Intervention for Dysarthria*

| Item on PEDro Scale   |                      |                   |                      |                                  |                          |                        |                       |                                    |                 |                          |                                |               |
|-----------------------|----------------------|-------------------|----------------------|----------------------------------|--------------------------|------------------------|-----------------------|------------------------------------|-----------------|--------------------------|--------------------------------|---------------|
| Source                | Eligibility Criteria | Random Allocation | Concealed Allocation | Participants Similar at Baseline | Blinding of Participants | Blinding of Therapists | Blinding of Assessors | Outcomes from >85% of Participants | Intent to Treat | Between Group Comparison | Point and Variability Measures | Overall Score |
| Skrabal et al. (2020) |                      |                   |                      |                                  |                          |                        |                       | X                                  | X               | X                        | X                              | 4             |

*Note.* PEDro, Physiotherapy Evidence Database. The letter ‘X’ indicates the presence of an item in a specific study; an empty cell represents the absence of an item in a specific study
