# Supplementary material
Source: publisher figshare collection journal article supplement (https://asha.figshare.com/articles/dataset/_/24964473)
Supplement: Supplementary file 18 [file 1]

**Table S2.1**

*Parkinson's disease: PEDro Scores for Studies Describing Lee Silverman Voice Treatment LOUD® (LSVT LOUD®)/LSVT® Extended (LSVT-X)/LSVT® Companion™ as Interventions for Dysarthria*

| Source                          | Eligibility Criteria | Random Allocation | Concealed Allocation | Participants Similar at Baseline | Blinding of Participants | Item on PEDro Scale    |                       |                                    |                 |                          |                                | Overall Score |
|---------------------------------|----------------------|-------------------|----------------------|----------------------------------|--------------------------|------------------------|-----------------------|------------------------------------|-----------------|--------------------------|--------------------------------|---------------|
|                                 |                      |                   |                      |                                  |                          | Blinding of Therapists | Blinding of Assessors | Outcomes from >85% of Participants | Intent to Treat | Between Group Comparison | Point and Variability Measures |               |
| Alharbi et al. (2019)           |                      |                   |                      |                                  |                          |                        |                       |                                    | X               |                          | X                              | 2             |
| Baumann et al. (2018)           |                      |                   |                      |                                  |                          |                        |                       | X                                  | X               |                          |                                | 2             |
| Baumgartner et al. (2001)       |                      | X                 | X                    | X                                |                          |                        | X                     | X                                  | X               | X                        | X                              | 8             |
| Cannito et al. (2012)           | X                    |                   |                      |                                  |                          |                        | X                     | X                                  | X               |                          | X                              | 5             |
| Constantin escu et al. (2011)   | X                    |                   |                      |                                  |                          |                        | X                     | X                                  | X               |                          | X                              | 5             |
| de Azevedo et al. (2015)        |                      |                   |                      |                                  |                          |                        |                       | X                                  | X               |                          | X                              | 3             |
| Dias et al. (2016)              | X                    |                   |                      |                                  |                          |                        | X                     | X                                  | X               |                          |                                | 4             |
| El Sharkawi et al. (2002)       | X                    |                   |                      |                                  |                          |                        | X                     | X                                  | X               |                          | X                              | 5             |
| Griffin et al. (2018)           |                      |                   |                      |                                  |                          |                        |                       | X                                  | X               | X                        | X                              | 4             |
| Halpern et al. (2012)           | X                    |                   |                      |                                  |                          |                        | X                     | X                                  | X               | X                        | X                              | 6             |
| Howell et al. (2009)            | X                    |                   |                      |                                  |                          |                        | X                     | X                                  | X               | X                        | X                              | 6             |
| Huber et al. (2003)             |                      |                   |                      |                                  |                          |                        |                       |                                    | X               | X                        | X                              | 3             |
| Levy et al. (2020)              | X                    | X                 | X                    | X                                |                          |                        | X                     | X                                  | X               | X                        | X                              | 9             |
| Körner Gustafsson et al. (2019) |                      |                   |                      |                                  |                          |                        |                       | X                                  | X               |                          |                                | 2             |
| Manor et al. (2005)             |                      |                   |                      |                                  |                          |                        |                       |                                    | X               |                          | X                              | 2             |
| Moya-Gale et al. (2018)         | X                    |                   |                      |                                  |                          |                        |                       | X                                  | X               |                          | X                              | 4             |

|                         |   |   |   |   |   |   |  |   |   |   |   |   |
|-------------------------|---|---|---|---|---|---|--|---|---|---|---|---|
| Nakayama et al. (2020)  | X |   |   |   | X |   |  | X | X | X | X | 5 |
| Narayana et al. (2010)  | X |   |   |   |   |   |  | X | X |   | X | 4 |
| Ramig et al. (1995)     | X | X |   | X |   |   |  | X | X | X | X | 7 |
| Ramig & Dromey (1996)   |   | X |   | X |   |   |  | X |   | X | X | 5 |
| Ramig et al. (1996)     |   | X |   | X |   |   |  | X | X | X | X | 6 |
| Ramig et al. (2001a)    |   | X |   | X |   |   |  |   |   | X | X | 4 |
| Ramig et al. (2001b)    | X | X |   | X |   | X |  | X |   | X | X | 7 |
| Ramig et al. (2018)     | X | X | X |   |   |   |  | X | X | X | X | 7 |
| Sackley et al. (2018)   | X |   |   |   |   | X |  | X | X |   | X | 5 |
| Saffarian et al. (2019) | X | X |   | X |   |   |  | X | X | X | X | 7 |
| Sale et al. (2015)      |   |   |   |   |   | X |  | X | X | X | X | 5 |
| Sapir et al. (2002)     |   | X |   | X |   |   |  | X | X | X | X | 6 |
| Sapir et al. (2007)     | X | X |   | X |   | X |  | X | X | X | X | 8 |
| Sauvageau et al. (2015) | X |   |   |   |   |   |  |   | X | X | X | 4 |
| Searl et al. (2011)     |   |   |   |   |   | X |  |   | X |   | X | 3 |
| Spielman et al. (2007)  |   |   |   | X |   |   |  | X |   | X | X | 4 |
| Spielman et al. (2011)  | X |   |   |   |   |   |  | X | X | X | X | 5 |
| Theodoros et al. (2006) |   |   |   |   |   | X |  | X | X | X | X | 5 |
| Theodoros et al. (2016) | X | X | X | X |   | X |  | X | X | X | X | 9 |
| Traverse (2016)         |   |   |   |   |   |   |  | X | X |   | X | 3 |
| Tripoliti et al. (2011) |   |   |   | X |   | X |  |   |   | X | X | 4 |

|                               |   |   |   |   |   |   |
|-------------------------------|---|---|---|---|---|---|
| Whitehill<br>et al.<br>(2011) |   | X | X | X | X | 4 |
| Wight &<br>Miller<br>(2015)   |   | X |   | X | X | 3 |
| Wohlert<br>(2004)             | X |   |   |   |   | 1 |

*Note.* PEDro, Physiotherapy Evidence Database. The letter ‘X’ indicates the presence of an item in a specific study; an empty cell represents the absence of an item in a specific study.
