# Supplementary material
Source: publisher figshare collection journal article supplement (https://asha.figshare.com/articles/dataset/_/24964473)
Supplement: Supplementary file 19 [file 1]

**Table S3**

*Parkinson's disease: Study Design Details and Participant Characteristics for SPEAK OUT!® and The LOUD Crowd as Treatment Modalities*

| Source                 | N  | Study design                    | Sex (% female) | Age range (years)                  | Dysarthria type | Inclusion/exclusion criteria                                                                                                                                                                                                                                                                                                                                                                                                                                             | Inferential statistics | Power analysis | Control group | Baseline data collected  | Control intervention | Number of treatment sessions                                                                              | Mode of treatment delivery                                    | Home exercise plan | Patient-reported outcomes | Treatment effect size |
|------------------------|----|---------------------------------|----------------|------------------------------------|-----------------|--------------------------------------------------------------------------------------------------------------------------------------------------------------------------------------------------------------------------------------------------------------------------------------------------------------------------------------------------------------------------------------------------------------------------------------------------------------------------|------------------------|----------------|---------------|--------------------------|----------------------|-----------------------------------------------------------------------------------------------------------|---------------------------------------------------------------|--------------------|---------------------------|-----------------------|
| Behrmann et al. (2020) | 40 | Prospective, quasi-experimental | 37.5%          | Mean: males = 69.6, females = 66.7 | NR              | Inclusion 1: <ul style="list-style-type: none"> <li>• No history of DBS</li> <li>• No history of speech therapy in the prior 2 years</li> <li>• No other medical diagnoses/procedures that could affect speech</li> <li>• Proficiency in English</li> </ul> Exclusion: <ul style="list-style-type: none"> <li>• Unable to follow instructions; confusion, disorganization</li> <li>• Self-reported or family-reported difficulties with ADLs due to cognition</li> </ul> | Yes                    | Yes            | Yes           | Yes – multiple baselines | No                   | 12 (3 days p/week for 4 weeks) SPEAK OUT!® sessions; 7 (1 day p/week for 7 weeks) The LOUD Crowd sessions | In person individual (SPEAK OUT!®) and group (The LOUD Crowd) | Yes                | Yes                       | No                    |
| Boutse et al. (2018)   | 16 | Prospective, quasi-experimental | 31.25%         | Mean = 71.6                        | Hypokinetic     | NR                                                                                                                                                                                                                                                                                                                                                                                                                                                                       | No                     | No             | No            | Yes – single baseline    | No                   | 12 (3 days p/week for 4 weeks)                                                                            | In person individual                                          | Yes                | Yes                       | No                    |

*Note.* NR, not reported. DBS, deep brain stimulation; PD, Parkinson's disease; ADLs, activities of daily living. Inclusion criteria: <sup>1</sup>No neurological diagnoses other than PD.
