# Supplementary material
Source: publisher figshare collection journal article supplement (https://asha.figshare.com/articles/dataset/_/24964473)
Supplement: Supplementary file 20 [file 1]

**Table S20**

*Cerebellar Ataxia: Study Design Details and Participant Characteristics for Lee Silverman Voice Treatment® – Extended Version as a Treatment Modality*

| Source              | N    | Study design                    | Sex (% female) | Age range (years) | Dysarthria type | Inclusion/exclusion criteria                                                                                                                                                                                                                                                                                                                                                       | Inferential statistics | Power analysis | Control group | Baseline data collected  | Control intervention | Number of treatment sessions | Mode of treatment delivery | Home exercise plan | Patient-reported outcomes | Treatment effect size |
|---------------------|------|---------------------------------|----------------|-------------------|-----------------|------------------------------------------------------------------------------------------------------------------------------------------------------------------------------------------------------------------------------------------------------------------------------------------------------------------------------------------------------------------------------------|------------------------|----------------|---------------|--------------------------|----------------------|------------------------------|----------------------------|--------------------|---------------------------|-----------------------|
| Lowit et al. (2020) | 19 * | Prospective; quasi-experimental | 47.60%         | 19-75             | Ataxic          | Inclusion: <ul style="list-style-type: none"> <li>• Diagnosis of progressive ataxia</li> <li>• Ataxic dysarthria</li> <li>• Age over 16 years</li> <li>• Ability to follow assessment and treatment tasks</li> <li>• Able to complete assessment and treatment tasks via Skype</li> </ul> Exclusion: <ul style="list-style-type: none"> <li>• Functional voice disorder</li> </ul> | Yes                    | No             | No            | Yes – multiple baselines | No                   | 16                           | Telepractice, individual   | Yes                | Yes                       | No                    |

*Note.* \* $n = 18$  with Friedreich's ataxia,  $n = 1$  with spinocerebellar ataxia type 6,  $n = 1$  with idiopathic cerebellar ataxia,  $n = 1$  with spastic paraplegia.
