# Supplementary material
Source: publisher figshare collection journal article supplement (https://asha.figshare.com/articles/dataset/_/24964473)
Supplement: Supplementary file 21 [file 1]

**Table S18**

*Multiple System Atrophy: Study Design Details and Participant Characteristics for Singing as a Treatment Modality*

| Source                | N     | Study design                    | Sex (% female) | Age range (years) | Dysarthria type | Inclusion/exclusion criteria                                                                                                                                                                                                                              | Inferential statistics | Power analysis | Control group | Baseline data collected | Control intervention | Number of treatment sessions                                                          | Mode of treatment delivery | Home exercise plan | Patient-reported outcomes | Treatment effect size |
|-----------------------|-------|---------------------------------|----------------|-------------------|-----------------|-----------------------------------------------------------------------------------------------------------------------------------------------------------------------------------------------------------------------------------------------------------|------------------------|----------------|---------------|-------------------------|----------------------|---------------------------------------------------------------------------------------|----------------------------|--------------------|---------------------------|-----------------------|
| Tamplin et al. (2019) | 75 *  | Prospective, quasi-experimental | 39.00%         | 51-93             | NR              | Inclusion 1:<br><ul style="list-style-type: none"> <li>(atypical PD not excluded)</li> <li>English speakers</li> <li>Normal cognition (MMSE &gt;24) or mild cognitive impairment (MMSE 18-23) with mandatory caregiver support</li> </ul> Exclusion: 2, 3 | Yes                    | No             | Yes           | Yes – single baseline   | Yes                  | Weekly group: 12 sessions; Monthly group: unspecified number of sessions for 3 months | In person, group           | No                 | Yes                       | No                    |
| Tamplin et al. (2020) | 75 ** | Prospective, quasi-experimental | 39.00%         | 51-93             | NR              | Inclusion 1:<br><ul style="list-style-type: none"> <li>PD or a caregiver to a person with PD</li> <li>Communication change in person with PD (per self-report, caregiver or health professional)</li> </ul> Exclusion: 2, 3                               | Yes                    | No             | Yes           | Yes – single baseline   | Yes                  | 2 hours of weekly or monthly treatment for 12 months                                  | In person, group           | No                 | Yes                       | No                    |

*Note.* NR, Not Reported. PD, Parkinson's disease. MMSE, Mini-Mental State Examination. Inclusion criteria: <sup>1</sup>Parkinson's disease. Exclusion criteria: <sup>2</sup>Moderate to severe cognitive impairment/MMSE <18 or memory problems; <sup>3</sup>Severe language problems or hearing impairment \**n* = 67 with Parkinson's disease, *n* = 5 with Lewy body dementia, *n* = 2 with progressive supranuclear palsy, *n* = 1 with multiple system atrophy. \*\* *n* = 71 with Parkinson's disease, *n* = 2 with progressive supranuclear palsy, *n* = 2 with multiple system atrophy.
