# Supplementary material
Source: publisher figshare collection journal article supplement (https://asha.figshare.com/articles/dataset/_/24964473)
Supplement: Supplementary file 22 [file 1]

**Table S24**

*Multiple Sclerosis: Study Design Details and Participant Characteristics for Expiratory Muscle Strength Training as a Treatment Modality*

| Source                     | N  | Study design                    | Sex (% female) | Age range (years) | Dysarthria type | Inclusion/exclusion criteria                                                                                                                                                                                                                                                                                                                                                                                                                                                                                                                       | Inferential statistics | Power analysis | Control group | Baseline data collected | Control intervention | Number of treatment sessions                            | Mode of treatment delivery | Home exercise plan | Patient-reported outcomes | Treatment effect size |
|----------------------------|----|---------------------------------|----------------|-------------------|-----------------|----------------------------------------------------------------------------------------------------------------------------------------------------------------------------------------------------------------------------------------------------------------------------------------------------------------------------------------------------------------------------------------------------------------------------------------------------------------------------------------------------------------------------------------------------|------------------------|----------------|---------------|-------------------------|----------------------|---------------------------------------------------------|----------------------------|--------------------|---------------------------|-----------------------|
| Chiara et al. <sup>5</sup> | 17 | Prospective; quasi-experimental | 82.0%          | Mean = 48.9       | NR              | Inclusion 1, 2: <ul style="list-style-type: none"> <li>• 20-59 years old</li> <li>• No smoking in the past 5 years (ex-smokers: FEV<sub>1</sub>/FVC &gt; 75%)</li> <li>• No prior speech/voice therapy</li> <li>• Diagnosis of MS per Poser's criteria</li> <li>• Mild (1-3.5) to moderate (4-6.5) disability per the EDSS</li> <li>• No disease exacerbation in past 3 months</li> <li>• Sufficient facial muscle strength to maintain lip closure around mouthpiece</li> </ul> Exclusion: <ul style="list-style-type: none"> <li>• NR</li> </ul> | Yes                    | No             | Yes           | Yes – single baseline   | No                   | 8 sessions with an investigator and 32 sessions at home | In person, individual      | Yes                | Yes                       | No                    |

*Note.* NR, not reported. FEV<sub>1</sub>/FVC, forced expiratory volume in the first second over forced vital capacity. EDSS, Expanded Disability Status Scale. Inclusion criteria: <sup>1</sup>No cardiac, pulmonary, orthopedic, or other neurological conditions than multiple sclerosis; <sup>2</sup>Native English speakers.
