# Supplementary material
Source: publisher figshare collection journal article supplement (https://asha.figshare.com/articles/dataset/_/24964473)
Supplement: Supplementary file 23 [file 1]

**Table S6**

*Parkinson's disease: Study Design Details and Participant Characteristics for Music Therapy/Singing as a Treatment Modality*

| Source                     | N  | Study design                    | Sex (% female) | Age range (years) | Dysarthria type | Inclusion/exclusion criteria                                                                                                                                                                                                                                                           | Inferential statistics | Power analysis | Control group | Baseline data collected | Control intervention | Number of treatment sessions                                                                      | Mode of treatment delivery | Home exercise plan | Patient-reported outcomes | Treatment effect size |
|----------------------------|----|---------------------------------|----------------|-------------------|-----------------|----------------------------------------------------------------------------------------------------------------------------------------------------------------------------------------------------------------------------------------------------------------------------------------|------------------------|----------------|---------------|-------------------------|----------------------|---------------------------------------------------------------------------------------------------|----------------------------|--------------------|---------------------------|-----------------------|
| Azeka wa et al. (2018)     | 5  | Prospective, quasi-experimental | 40.00%         | 57-81             | Hypokinetic     | Inclusion 1, 2, 3:<br><ul style="list-style-type: none"> <li>• Hoehn &amp; Yahr stage I-III</li> <li>• Age 50+ years</li> <li>• Onset of PD after age 50</li> </ul>                                                                                                                    | Yes                    | No             | No            | Yes – single baseline   | No                   | 6 (1 session p/week for 6 weeks)                                                                  | In person, group           | No                 | No                        | Yes                   |
| Di Benedetto et al. (2009) | 20 | Prospective, quasi-experimental | 35.00%         | Mean = 66         | NR              | Exclusion 5:<br><ul style="list-style-type: none"> <li>• Alcoholism</li> <li>• Drug abuse</li> <li>• Psychiatric illness</li> <li>• Head injury</li> <li>• Hamilton Depression Scale score &lt; 13</li> </ul>                                                                          | Yes                    | No             | No            | Yes – single baseline   | No                   | Speech/voice therapy: 20 hours (2 sessions p/week)<br>Choral singing: 26 hours (1 session p/week) | In person, individual      | No                 | No                        | No                    |
| Elefant et al. (2012)      | 10 | Prospective, quasi-experimental | 30.00%         | 55-84             | NR              | NR                                                                                                                                                                                                                                                                                     | Yes                    | No             | No            | Yes – single baseline   | No                   | 20 (1 session p/week for 20 weeks)                                                                | In person, group           | No                 | Yes                       | No                    |
| Evans et al. (2012)        | 10 | Prospective, quasi-experimental | 35.00%         | 48-81             | NR              | Inclusion:<br><ul style="list-style-type: none"> <li>• Parkinsonism</li> <li>• Able to read English songs</li> <li>• Independently mobile or have caregiver support</li> </ul> Exclusion:<br><ul style="list-style-type: none"> <li>• Requiring additional physical support</li> </ul> | Yes                    | No             | No            | Yes – single baseline   | No                   | 2 hour session every week for 2 years                                                             | In person, group           | No                 | Yes                       | No                    |
| Haneishi (2001)            | 4  | Prospective, quasi-experimental | 100.00 %       | 67-77             | NR              | Inclusion 3:<br><ul style="list-style-type: none"> <li>• One or more of: reduced loudness, change in vocal quality, imprecise articulation, monopitch,</li> </ul>                                                                                                                      | Yes                    | No             | No            | Yes – single baseline   | No                   | 12-14 (3 sessions p/week)                                                                         | In person, individual      | No                 | Yes                       | No                    |

|                             |     |                                 |        |       |             |                                                                                                                                                                                                                                                                                                                                 |     |    |     |                       |     |                                                              |                  |     |     |    |  |
|-----------------------------|-----|---------------------------------|--------|-------|-------------|---------------------------------------------------------------------------------------------------------------------------------------------------------------------------------------------------------------------------------------------------------------------------------------------------------------------------------|-----|----|-----|-----------------------|-----|--------------------------------------------------------------|------------------|-----|-----|----|--|
|                             |     |                                 |        |       |             | vocal tremor, changes in speech rate, lowered pitch                                                                                                                                                                                                                                                                             |     |    |     |                       |     |                                                              |                  |     |     |    |  |
|                             |     |                                 |        |       |             | <ul style="list-style-type: none"><li>• Problems with breathing (e.g. shallow breath support)</li><li>• No speech/voice therapy during the study</li><li>• Sufficient hearing to follow directions</li><li>• Sufficient vision to read large print</li><li>• No diagnosis of dementia</li></ul> Maintain sitting for 60 minutes |     |    |     |                       |     |                                                              |                  |     |     |    |  |
| Higgins & Richardson (2019) | 10  | Prospective, quasi-experimental | 50.00% | 57-80 | Hypokinetic | Inclusion 2, 3, 4: <ul style="list-style-type: none"><li>• Hypokinetic dysarthria secondary to PD per SLP</li><li>• No depression per Beck Depression Inventory</li></ul> Exclusion: <ul style="list-style-type: none"><li>• No voice therapy in the previous year</li></ul>                                                    | Yes | No | No  | Yes – single baseline | No  | 11 (1 session p/week for 11 weeks)                           | In person, group | Yes | No  | No |  |
| Shih et al. (2012)          | 13  | Prospective, quasi-experimental | 15.30% | 54-70 | NR          | Inclusion 1, 4: <ul style="list-style-type: none"><li>• Hoehn &amp; Yahr stage I-V</li><li>• Self-perceived voice/speech impairment</li><li>• VHI &gt; 8</li><li>• Able to commit to 12 week study</li></ul>                                                                                                                    | Yes | No | No  | No                    | No  | 12 (1 session p/week for 12 weeks)                           | In person, group | No  | Yes | No |  |
| Tamplin et al. (2019)       | 75* | Prospective, quasi-experimental | 39.00% | 51-93 | NR          | Inclusion 1, 4: <ul style="list-style-type: none"><li>• (atypical PD not excluded)</li><li>• English speakers</li><li>• Normal cognition or</li></ul>                                                                                                                                                                           | Yes | No | Yes | Yes – single baseline | Yes | Weekly group: 12 sessions; Monthly group: unspecified number | In person, group | No  | Yes | No |  |

|                          |      |                                 |        |              |    |                                                                                                                                                                                                                                                                                                                                      |     |     |     |                          |     |                                                        |                  |     |     |     |
|--------------------------|------|---------------------------------|--------|--------------|----|--------------------------------------------------------------------------------------------------------------------------------------------------------------------------------------------------------------------------------------------------------------------------------------------------------------------------------------|-----|-----|-----|--------------------------|-----|--------------------------------------------------------|------------------|-----|-----|-----|
|                          |      |                                 |        |              |    | mild cognitive impairment (MMSE 18-23) with mandatory caregiver support<br>Exclusion: <ul style="list-style-type: none"><li>Moderate to severe cognitive impairment (MMSE &lt; 18) or memory problems</li><li>Severe language problems or hearing impairment</li></ul>                                                               |     |     |     |                          |     | of sessions for 3 months                               |                  |     |     |     |
| Tamplin et al. (2020)    | 75** | Prospective, quasi-experimental | 39.00% | 51-93        | NR | Inclusion 1: <ul style="list-style-type: none"><li>PD or a caregiver to a person with PD</li><li>Communication change in person with PD (per self-report, caregiver or health professional)</li></ul> Exclusion: <ul style="list-style-type: none"><li>MMSE &lt; 18</li><li>Severe language problems or hearing impairment</li></ul> | Yes | No  | Yes | Yes – single baseline    | Yes | 2 hours of weekly or monthly treatment for 12 months   | In person, group | No  | Yes | No  |
| Tanner et al. (2016)     | 28   | Prospective, quasi-experimental | 50.00% | Mean = 65.25 | NR | Inclusion 1: <ul style="list-style-type: none"><li>Hoehn &amp; Yahr scale ≤ III</li></ul>                                                                                                                                                                                                                                            | Yes | Yes | No  | Yes – multiple baselines | No  | 36 (3 sessions p/week for 6 weeks; 2 treatment blocks) | In person, group | Yes | No  | Yes |
| Yinger & Lapointe (2012) | 10   | Prospective, quasi-experimental | 30.00% | 59-84        | NR | NR                                                                                                                                                                                                                                                                                                                                   | Yes | No  | No  | Yes – single baseline    | No  | 12 (2 sessions p/week for 6 weeks)                     | In person, group | No  | No  | No  |

*Note.* PD, Parkinson's disease; MMSE, Mini-Mental Status Examination; VHI, Voice Handicap Index; SLP, Speech-language Pathologist. Inclusion criteria: <sup>1</sup>Diagnosis of Parkinson's disease; <sup>2</sup>No other neurological or cognitive comorbidity; <sup>3</sup>Native English speaker; <sup>4</sup>Normal cognition/MMSE > 24. Exclusion criteria: <sup>5</sup>Abnormal cognition/MMSE < 24. \**n* = 67 with Parkinson's disease, *n* = 5 with Lewy body dementia, *n* = 2 with progressive supranuclear palsy, *n* = 1 with multiple system atrophy. \*\* *n* = 71 with Parkinson's disease, *n* = 2 with progressive supranuclear palsy, *n* = 2 with multiple system atrophy.
