# Supplementary material
Source: publisher figshare collection journal article supplement (https://asha.figshare.com/articles/dataset/_/24964473)
Supplement: Supplementary file 24 [file 1]

**Table S17**

*Multiple System Atrophy: Study Design Details and Participant Characteristics for Verbal Cueing as a Treatment Modality*

| Source                | N    | Study design                    | Sex (% female) | Age range (years) | Dysarthria type                                                                                                                                                    | Inclusion/exclusion criteria | Inferential statistics | Power analysis | Control group | Baseline data collected | Control intervention | Number of treatment sessions | Mode of treatment delivery | Home exercise plan | Patient-reported outcomes | Treatment effect size |
|-----------------------|------|---------------------------------|----------------|-------------------|--------------------------------------------------------------------------------------------------------------------------------------------------------------------|------------------------------|------------------------|----------------|---------------|-------------------------|----------------------|------------------------------|----------------------------|--------------------|---------------------------|-----------------------|
| Skrabal et al. (2020) | 51 * | Prospective, Quasi-experimental | 47.00%         | 49-74             | Hypokinetic<br>Spastic<br>Ataxic<br>Mixed:<br>hypokinetic-spastic<br>Mixed:<br>hypokinetic-ataxic<br>Mixed:<br>hypokinetic-spastic-ataxic<br>Mixed: ataxic-spastic | NR                           | Yes                    | No             | Yes           | No                      | Yes                  | 1                            | In person, individual      | No                 | No                        | No                    |

*Note.* NR, Not Reported. \* $n = 17$  with Parkinson's disease,  $n = 17$  with multiple system atrophy,  $n = 17$  with progressive supranuclear palsy,  $n = 17$  healthy controls.
