# Supplementary material
Source: publisher figshare collection journal article supplement (https://asha.figshare.com/articles/dataset/_/24964473)
Supplement: Supplementary file 25 [file 1]

**Table S5**

*Parkinson's disease: Study Design Details and Participant Characteristics for Pitch Limiting Voice Treatment (PVL T) as a Treatment Modality*

| Source                 | N  | Study design                    | Sex (% female) | Age range (years) | Dysarthria type | Inclusion/exclusion criteria                                                                                                                                                                                                                                                                                                                                                                     | Inferential statistics | Power analysis | Control group | Baseline data collected  | Control intervention | Number of treatment sessions | Mode of treatment delivery | Home exercise plan | Patient-reported outcomes | Treatment effect size |
|------------------------|----|---------------------------------|----------------|-------------------|-----------------|--------------------------------------------------------------------------------------------------------------------------------------------------------------------------------------------------------------------------------------------------------------------------------------------------------------------------------------------------------------------------------------------------|------------------------|----------------|---------------|--------------------------|----------------------|------------------------------|----------------------------|--------------------|---------------------------|-----------------------|
| de Swart et al. (2003) | 32 | Prospective, quasi-experimental | 47.00%         | 36-75             | NR              | Inclusion: <ul style="list-style-type: none"> <li>• PD</li> <li>• Mild to severe voice disorder</li> </ul> Exclusion: <ul style="list-style-type: none"> <li>• Severe dysarthria</li> <li>• Hearing impairment</li> <li>• MMSE &lt; 25</li> <li>• Concomitant neurologic disorder</li> <li>• Depression</li> <li>• 'One-off' phenomena</li> <li>• Speech therapy in the previous year</li> </ul> | Yes                    | Yes            | No            | Yes – multiple baselines | No                   | 1                            | In person, individual      | No                 | Yes                       | No                    |

*Note.* NR, not reported. PD, Parkinson's disease. MMSE, Mini-Mental State Examination.
