# Supplementary material
Source: publisher figshare collection journal article supplement (https://asha.figshare.com/articles/dataset/_/24964473)
Supplement: Supplementary file 27 [file 1]

**Table S25**

*Multiple Sclerosis: Study Design Details and Participant Characteristics for Lee Silverman Voice Treatment® as a Treatment Modality*

| Source                 | N | Study design                | Sex (% female) | Age range (years) | Dysarthria type | Inclusion/exclusion criteria                                                                                                                                                                                                                                                                                                                                                                                                                         | Inferential statistics | Power analysis | Control group | Baseline data collected  | Control intervention | Number of treatment sessions | Mode of treatment delivery | Home exercise plan | Patient-reported outcomes | Treatment effect size |
|------------------------|---|-----------------------------|----------------|-------------------|-----------------|------------------------------------------------------------------------------------------------------------------------------------------------------------------------------------------------------------------------------------------------------------------------------------------------------------------------------------------------------------------------------------------------------------------------------------------------------|------------------------|----------------|---------------|--------------------------|----------------------|------------------------------|----------------------------|--------------------|---------------------------|-----------------------|
| Baldanzi et al. (2020) | 8 | Prospective; Single-subject | 12.50%         | 53-79             | NR              | Inclusion: <ul style="list-style-type: none"> <li>• Age over 18 years</li> <li>• Clinical stability in MS symptoms</li> <li>• Hypophonia (voice in conversation &lt;60 dB SPL)</li> <li>• MMSE &gt;21</li> </ul> Exclusion 1: <ul style="list-style-type: none"> <li>• History of laryngeal cancer, radiotherapy, head/neck trauma, intubation</li> <li>• Visual/hearing problems, severe cognitive impairment, psychiatric comorbidities</li> </ul> | Yes                    | No             | Yes           | Yes – multiple baselines | No                   | 16                           | In person individual       | Yes                | Yes                       | No                    |

*Note.* MS, multiple sclerosis. MMSE, Mini Mental State Examination. NR, not reported. Exclusion criteria: <sup>1</sup>No other neurological disease than MS.
