# Supplementary material
Source: publisher figshare collection journal article supplement (https://asha.figshare.com/articles/dataset/_/24964473)
Supplement: Supplementary file 29 [file 1]

**Table S7.1**

*Parkinson's disease: PEDro Scores for Studies Describing Verbal Cueing/Articulation Therapy/Speech Therapy as Interventions for Dysarthria*

| Source                     | Eligibility Criteria | Random Allocation | Concealed Allocation | Participants Similar at Baseline | Blinding of Participants | Item on PEDro Scale    |                       |                                    | Intent to Treat | Between Group Comparison | Point and Variability Measures | Overall Score |
|----------------------------|----------------------|-------------------|----------------------|----------------------------------|--------------------------|------------------------|-----------------------|------------------------------------|-----------------|--------------------------|--------------------------------|---------------|
|                            |                      |                   |                      |                                  |                          | Blinding of Therapists | Blinding of Assessors | Outcomes from >85% of Participants |                 |                          |                                |               |
| Hsu et al. (2019)          |                      |                   |                      |                                  |                          |                        |                       | X                                  | X               |                          | X                              | 3             |
| Martens et al. (2015)      | X                    |                   |                      |                                  |                          |                        |                       |                                    | X               |                          | X                              | 3             |
| Ramig et al. (2018)        | X                    | X                 | X                    |                                  |                          |                        |                       | X                                  | X               | X                        | X                              | 7             |
| Robertson & Thomson (1984) |                      | X                 |                      | X                                |                          |                        |                       |                                    |                 | X                        | X                              | 4             |
| Sadagopan & Huber (2007)   | X                    | X                 |                      |                                  |                          |                        |                       | X                                  | X               | X                        | X                              | 6             |
| Skrabal et al. (2020)      |                      |                   |                      |                                  |                          |                        |                       | X                                  | X               | X                        | X                              | 4             |
| Tjaden & Wilding (2004)    |                      |                   |                      |                                  |                          |                        | X                     | X                                  | X               | X                        | X                              | 5             |
| Tjaden & Wilding (2011)    |                      |                   |                      |                                  |                          |                        |                       | X                                  | X               | X                        | X                              | 4             |
| Tjaden & Wilding (2013)    |                      |                   |                      |                                  |                          |                        |                       | X                                  | X               | X                        | X                              | 4             |
| Tjaden et al. (2014)       |                      |                   |                      |                                  |                          |                        |                       | X                                  | X               | X                        | X                              | 4             |

**Note.** PEDro, Physiotherapy Evidence Database. The letter 'X' indicates the presence of an item in a specific study; an empty cell represents the absence of an item in a specific study.
