# Supplementary material
Source: publisher figshare collection journal article supplement (https://asha.figshare.com/articles/dataset/_/24964473)
Supplement: Supplementary file 32 [file 1]

**Table S10**

*Parkinson's disease: Study Design Details and Participant Characteristics for Voice Therapy as a Treatment Modality*

| Source                   | N  | Study design                    | Sex (% female) | Age range (years) | Dysarthria type | Inclusion/exclusion criteria                                                                                                                                                                                                                                                    | Inferential statistics | Power analysis | Control group | Baseline data collected | Control intervention | Number of treatment sessions                                                                                                | Mode of treatment delivery | Home exercise plan | Patient-reported outcomes | Treatment effect size |
|--------------------------|----|---------------------------------|----------------|-------------------|-----------------|---------------------------------------------------------------------------------------------------------------------------------------------------------------------------------------------------------------------------------------------------------------------------------|------------------------|----------------|---------------|-------------------------|----------------------|-----------------------------------------------------------------------------------------------------------------------------|----------------------------|--------------------|---------------------------|-----------------------|
| Chang et al. (2019)      | 11 | Prospective, quasi-experimental | 36.35%         | NR                | NR              | Inclusion:<br><ul style="list-style-type: none"> <li>No neurological disease other than PD</li> <li>No history of speech disorder</li> <li>Normal/corrected vision</li> </ul>                                                                                                   | Yes                    | No             | No            | Yes – single baseline   | No                   | 12 (4 weeks)                                                                                                                | Telepractice, individual   | No                 | Yes                       | No                    |
| de Angelis et al. (1997) | 20 | Prospective, quasi-experimental | 15.00%         | 48-85             | NR              | Inclusion:<br><ul style="list-style-type: none"> <li>Oral communication complaints</li> </ul> Exclusion:<br><ul style="list-style-type: none"> <li>Hoehn &amp; Yahr stage I or V</li> <li>Inability to participate in treatment</li> </ul>                                      | Yes                    | No             | No            | Yes – single baseline   | No                   | 13 (3 sessions p/week for 1 month)                                                                                          | In person, individual      | Yes                | Yes                       | No                    |
| de Lira et al. (2020)    | 30 | Prospective, quasi-experimental | 50.00%         | NR                | NR              | Inclusion:<br><ul style="list-style-type: none"> <li>Preserved autonomy</li> </ul> Exclusion:<br><ul style="list-style-type: none"> <li>Cognitive difficulties</li> <li>Pharyngolaryngeal infections</li> <li>Regular LSVT LOUD®</li> <li>Neurosurgical intervention</li> </ul> | Yes                    | No             | No            | Yes – single baseline   | No                   | 1                                                                                                                           | In person, individual      | No                 | Yes                       | No                    |
| Gupta et al. (2008)      | 18 | Prospective, quasi-experimental | Not reported   | NR                | NR              | Not reported                                                                                                                                                                                                                                                                    | Yes                    | No             | No            | Yes – single baseline   | No                   | Group 1: 16 (2 sessions p/week)<br>Group 2: 23 (1 session p/week for 8 months)<br>Group 3: 9 (1 session p/week for 9 weeks) | In person, group           | Yes                | No                        | No                    |

Supplemental material, Perry et al., “Behavioral Management of Respiratory/Phonatory Dysfunction for Dysarthria Associated With Neurodegenerative Disease: A Systematic Review,” *AJSLP*, [https://doi.org/10.1044/2023\\_AJSLP-23-00274](https://doi.org/10.1044/2023_AJSLP-23-00274)

|                      |    |                                 |        |       |    |    |     |    |    |                          |     |                                   |                       |    |    |    |
|----------------------|----|---------------------------------|--------|-------|----|----|-----|----|----|--------------------------|-----|-----------------------------------|-----------------------|----|----|----|
| Scott & Caird (1984) | 11 | Prospective, quasi-experimental | 45.40% | 49-83 | NR | NR | Yes | No | No | Yes – multiple baselines | Yes | 10 (1 hour sessions over 2 weeks) | In person, individual | No | No | No |
|----------------------|----|---------------------------------|--------|-------|----|----|-----|----|----|--------------------------|-----|-----------------------------------|-----------------------|----|----|----|

*Note.* PD, Parkinson’s disease; LSVT LOUD®, Lee Silverman Voice Treatment. NR, not reported.
