# Supplementary material
Source: publisher figshare collection journal article supplement (https://asha.figshare.com/articles/dataset/_/24964473)
Supplement: Supplementary file 34 [file 1]

**Table S4**

*Parkinson's disease: Study Design Details and Participant Characteristics for Loud and Proud as a Treatment Modality*

| Source                | N  | Study design                    | Sex (% female) | Age range (years) | Dysarthria type | Inclusion/exclusion criteria                                                                                                                                                                                                                                                                                   | Inferential statistics | Power analysis | Control group | Baseline data collected | Control intervention | Number of treatment sessions                 | Mode of treatment delivery | Home exercise plan | Patient-reported outcomes | Treatment effect size |
|-----------------------|----|---------------------------------|----------------|-------------------|-----------------|----------------------------------------------------------------------------------------------------------------------------------------------------------------------------------------------------------------------------------------------------------------------------------------------------------------|------------------------|----------------|---------------|-------------------------|----------------------|----------------------------------------------|----------------------------|--------------------|---------------------------|-----------------------|
| Edwards et al. (2018) | 12 | Prospective, quasi-experimental | 33.33%         | 60-76             | Hypokinetic     | Inclusion: 1 <ul style="list-style-type: none"> <li>• Completion of LSVT LOUD® at least 3 months previously</li> <li>• Stable medications</li> <li>• Sufficient English proficiency to participate</li> </ul> Exclusion: 1, 2, 3<br>History of drug or alcohol abuse                                           | Yes                    | No             | No            | Yes – single baseline   | No                   | 8 (1 x 90 minute session p/week for 8 weeks) | In person, group           | Yes                | Yes                       | No                    |
| Quinn et al. (2019)   | 8  | Prospective, quasi-experimental | 25.00%         | 61-81             | Hypokinetic     | Inclusion: <ul style="list-style-type: none"> <li>• MoCA ≥ 18</li> </ul> Exclusion: <ul style="list-style-type: none"> <li>• DBS</li> <li>• Speech treatment other than LSVT LOUD®</li> <li>• Other medical diagnosis likely to impact speech</li> <li>• No access to computer or adequate internet</li> </ul> | Yes                    | No             | No            | Yes – single baseline   | No                   | 8 (2 session p/week for 4 weeks)             | Telepractice, group        | Yes                | Yes                       | No                    |

*Note.* MoCA, Montreal Cognitive Assessment; DBS, deep brain stimulation.
