# Supplementary material
Source: publisher figshare collection journal article supplement (https://asha.figshare.com/articles/dataset/_/24964473)
Supplement: Supplementary file 35 [file 1]

**Table S11**

*Parkinson's disease: Study Design Details and Participant Characteristics for Delayed Auditory Feedback/Frequency-Shifted Feedback as Treatment Modalities*

| Source                | N  | Study design                    | Sex (% female) | Age range (years) | Dysarthria type | Inclusion/exclusion criteria  | Inferential statistics | Power analysis | Control group | Baseline data collected | Control intervention | Number of treatment sessions | Mode of treatment delivery | Home exercise plan | Patient-reported outcomes | Treatment effect size |
|-----------------------|----|---------------------------------|----------------|-------------------|-----------------|-------------------------------|------------------------|----------------|---------------|-------------------------|----------------------|------------------------------|----------------------------|--------------------|---------------------------|-----------------------|
| Brendel et al. (2004) | 16 | Prospective, quasi-experimental | 19.00%         | 59-75             | NR              | Inclusion:<br>• Idiopathic PD | Yes                    | No             | Yes           | No                      | Yes                  | 1                            | In person, individual      | No                 | No                        | No                    |

*Note.* PD, Parkinson's disease. NR, not reported.
