# Supplementary material
Source: publisher figshare collection journal article supplement (https://asha.figshare.com/articles/dataset/_/24964473)
Supplement: Supplementary file 36 [file 1]

**Table S21**

*Huntington's disease: Study Design Details and Participant Characteristics for Speech Therapy as a Treatment Modality*

| Source                | N | Study design                    | Sex (% female) | Age range (years) | Dysarthria type | Inclusion/exclusion criteria                                                                                                                                                                                                                                                                                | Inferential statistics | Power analysis | Control group | Baseline data collected | Control intervention | Number of treatment sessions    | Mode of treatment delivery      | Home exercise plan | Patient-reported outcomes | Treatment effect size |
|-----------------------|---|---------------------------------|----------------|-------------------|-----------------|-------------------------------------------------------------------------------------------------------------------------------------------------------------------------------------------------------------------------------------------------------------------------------------------------------------|------------------------|----------------|---------------|-------------------------|----------------------|---------------------------------|---------------------------------|--------------------|---------------------------|-----------------------|
| Giddens et al. (2010) | 5 | Prospective; Quasi-experimental | 80.00%         | 42-62             | NR              | Exclusion: <ul style="list-style-type: none"> <li>• MMSE &lt;20</li> <li>• Hypertension unresponsive to medication</li> <li>• Blood pressure &gt; 140/90 mmHg</li> <li>• History of cardiovascular medication, chest pain, or MI</li> <li>• History of stroke</li> <li>• Chronic, daily headache</li> </ul> | Yes                    | No             | No            | Yes – single baseline   | No                   | 2 x exercises p/day for 1 month | In person, individual and group | Yes                | Yes                       | No                    |

*Note.* NR, Not Reported. MMSE, Mini-Mental State Examination. MI, myocardial infarction.
