# Supplementary material
Source: publisher figshare collection journal article supplement (https://asha.figshare.com/articles/dataset/_/24964473)
Supplement: Supplementary file 37 [file 1]

**Table S10.1**

*Parkinson's disease: PEDro Scores for Studies Describing Voice Therapy as an Intervention for Dysarthria*

| Source                   | Item on PEDro Scale  |                   |                      |                                  |                          |                        |                       |                                    |                 |                          |                                | Overall Score |
|--------------------------|----------------------|-------------------|----------------------|----------------------------------|--------------------------|------------------------|-----------------------|------------------------------------|-----------------|--------------------------|--------------------------------|---------------|
|                          | Eligibility Criteria | Random Allocation | Concealed Allocation | Participants Similar at Baseline | Blinding of Participants | Blinding of Therapists | Blinding of Assessors | Outcomes from >85% of Participants | Intent to Treat | Between Group Comparison | Point and Variability Measures |               |
| Chang et al. (2019)      | X                    |                   |                      |                                  |                          |                        |                       | X                                  | X               |                          | X                              | 4             |
| de Angelis et al. (1997) | X                    |                   |                      |                                  |                          |                        |                       | X                                  |                 | X                        | X                              | 4             |
| de Lira et al. (2020)    |                      |                   |                      |                                  |                          |                        |                       | X                                  | X               |                          | X                              | 3             |
| Gupta et al. (2008)      |                      |                   |                      |                                  |                          |                        |                       | X                                  | X               |                          | X                              | 3             |
| Scott & Caird (1984)     |                      |                   |                      |                                  |                          |                        |                       |                                    | X               |                          | X                              | 2             |

**Note.** PEDro, Physiotherapy Evidence Database. The letter 'X' indicates the presence of an item in a specific study; an empty cell represents the absence of an item in a specific study
