# Supplementary material
Source: publisher figshare collection journal article supplement (https://asha.figshare.com/articles/dataset/_/24964473)
Supplement: Supplementary file 38 [file 1]

**Table S9**

*Parkinson's disease: Study Design Details and Participant Characteristics for Masking Noise/SpeechVive™ as a Treatment Modality*

| Source                   | N  | Study design                    | Sex (% female) | Age range (years) | Dysarthria type | Inclusion/exclusion criteria                                                                                                                                                                                                                                                                                                                                                             | Inferential statistics | Power analysis | Control group | Baseline data collected  | Control intervention | Number of treatment sessions                                                           | Mode of treatment delivery | Home exercise plan | Patient-reported outcomes | Treatment effect size |
|--------------------------|----|---------------------------------|----------------|-------------------|-----------------|------------------------------------------------------------------------------------------------------------------------------------------------------------------------------------------------------------------------------------------------------------------------------------------------------------------------------------------------------------------------------------------|------------------------|----------------|---------------|--------------------------|----------------------|----------------------------------------------------------------------------------------|----------------------------|--------------------|---------------------------|-----------------------|
| Coutinho et al. (2009)   | 26 | Prospective, quasi-experimental | 42.00%         | 40-86             | NR              | Inclusion: <ul style="list-style-type: none"> <li>• Hoehn &amp; Yahr stage II</li> <li>• No more than moderate hearing loss</li> <li>• Mild or moderate dysphonia per GRBAS scale</li> <li>• No laryngeal comorbidities (e.g., Reinke's edema, reflux)</li> </ul> Exclusion: <ul style="list-style-type: none"> <li>• Language impairment</li> <li>• Parkinson-plus syndromes</li> </ul> | Yes                    | No             | No            | No                       | Yes                  | 1                                                                                      | In person, individual      | No                 | No                        | No                    |
| Quedas et al. (2007)     | 17 | Prospective, quasi-experimental | 52.90%         | NR                | NR              | Inclusion 1, 2, 3: <ul style="list-style-type: none"> <li>• GRBAS score 0 or 1 for level of dysphonia</li> <li>• Language impairment score 0 or 1 per Webster scale of PD disability</li> <li>• Hoehn &amp; Yahr stage I-II</li> <li>• Levodopa therapy</li> <li>• Age 60-75</li> </ul>                                                                                                  | Yes                    | No             | Yes           | No                       | No                   | 1                                                                                      | In person, individual      | No                 | No                        | No                    |
| Richardson et al. (2014) | 10 | Prospective, quasi-experimental | 20.00%         | 68-86             | NR              | Inclusion 1, 2, 4: <ul style="list-style-type: none"> <li>• Hypophonia per SLP</li> <li>• Unaided hearing in at least one ear</li> </ul>                                                                                                                                                                                                                                                 | Yes                    | No             | No            | Yes – multiple baselines | No                   | 2-8 hours wearing SpeechVive device + 30 mins reading aloud, 5 days p/week for 8 weeks | In person, individual      | Yes                | No                        | No                    |

|                            |    |                                 |        |       |             |                                                                                                                                                                                                                                                                                             |     |    |     |                       |     |   |                       |    |    |     |
|----------------------------|----|---------------------------------|--------|-------|-------------|---------------------------------------------------------------------------------------------------------------------------------------------------------------------------------------------------------------------------------------------------------------------------------------------|-----|----|-----|-----------------------|-----|---|-----------------------|----|----|-----|
| Sadagopan & Huber (2007)   | 14 | Prospective, quasi-experimental | 35.70% | 51-90 | NR          | Inclusion 3:<br><ul style="list-style-type: none"> <li>• Living independently in the community</li> <li>• Ambulatory</li> <li>• Normal cognition per MMSE</li> </ul>                                                                                                                        | Yes | No | Yes | No                    | No  | 1 | In person, individual | No | No | Yes |
| Stathopoulos et al. (2014) | 33 | Prospective, quasi-experimental | 18.10% | 47-83 | Hypokinetic | Inclusion 1, 2, 4:<br><ul style="list-style-type: none"> <li>• Hypophonia per SLP</li> <li>• No respiratory comorbidities</li> <li>• No history of head/neck/chest surgery (except for DBS)</li> <li>• No smoking in past 5 years</li> <li>• Unaided hearing in at least one ear</li> </ul> | Yes | No | No  | Yes – single baseline | Yes | 1 | In person, individual | No | No | No  |

*Note.* PD, Parkinson's disease. SLP, Speech-language Pathologist. DBS, Deep Brain Stimulation. NR, not reported. MMSE, Mini-Mental State Examination. Inclusion criteria: <sup>1</sup>Parkinson's disease; <sup>2</sup>No other neurological comorbidity than Parkinson's disease, <sup>3</sup>Normal hearing acuity, <sup>4</sup>Speaker of standard American English.
