# Supplementary material
Source: publisher figshare collection journal article supplement (https://asha.figshare.com/articles/dataset/_/24964473)
Supplement: Supplementary file 39 [file 1]

**Table S11.1**  
*Parkinson’s disease: PEDro Scores for the Study Describing Delayed Auditory Feedback/Frequency-Shifted Feedback as Interventions for Dysarthria*

| Source                | Eligibility Criteria | Random Allocation | Concealed Allocation | Participants Similar at Baseline | Item on PEDro Scale      |                        |                       | Outcomes from >85% of Participants | Intent to Treat | Between Group Comparison | Point and Variability Measures | Overall Score |
|-----------------------|----------------------|-------------------|----------------------|----------------------------------|--------------------------|------------------------|-----------------------|------------------------------------|-----------------|--------------------------|--------------------------------|---------------|
|                       |                      |                   |                      |                                  | Blinding of Participants | Blinding of Therapists | Blinding of Assessors |                                    |                 |                          |                                |               |
| Brendel et al. (2004) |                      |                   |                      |                                  |                          |                        | X                     | X                                  | X               | X                        |                                | 4             |

*Note.* PEDro, Physiotherapy Evidence Database. The letter ‘X’ indicates the presence of an item in a specific study; an empty cell represents the absence of an item in a specific study.
