# Supplementary material
Source: publisher figshare collection journal article supplement (https://asha.figshare.com/articles/dataset/_/24964473)
Supplement: Supplementary file 40 [file 1]

**Table S23.1**

*Multiple Sclerosis: PEDro Scores for Studies Describing Verbal Cueing as an Intervention for Dysarthria*

| Source                  | Eligibility Criteria | Random Allocation | Concealed Allocation | Participants Similar at Baseline | Blinding of Participants | Item on PEDro Scale    |                       |                                    |                 |                          | Point and Variability Measures | Overall Score |
|-------------------------|----------------------|-------------------|----------------------|----------------------------------|--------------------------|------------------------|-----------------------|------------------------------------|-----------------|--------------------------|--------------------------------|---------------|
|                         |                      |                   |                      |                                  |                          | Blinding of Therapists | Blinding of Assessors | Outcomes from >85% of Participants | Intent to Treat | Between Group Comparison |                                |               |
| Tjaden & Wilding (2004) |                      |                   |                      |                                  |                          |                        |                       | X                                  | X               | X                        | X                              | 4             |
| Tjaden & Wilding (2011) |                      |                   |                      |                                  |                          |                        |                       | X                                  | X               | X                        | X                              | 4             |
| Tjaden et al. (2013)    |                      |                   |                      |                                  |                          |                        |                       | X                                  | X               | X                        | X                              | 4             |
| Tjaden et al. (2014)    |                      |                   |                      |                                  |                          |                        | X                     | X                                  | X               | X                        | X                              | 5             |

*Note.* PEDro, Physiotherapy Evidence Database. The letter 'X' indicates the presence of an item in a specific study; an empty cell represents the absence of an item in a specific study.
