# Supplementary material
Source: publisher figshare collection journal article supplement (https://asha.figshare.com/articles/dataset/_/24964473)
Supplement: Supplementary file 42 [file 1]

**Table S1**

*Databases, Keyword and Subject Headings used in Electronic Database Searches*

| Keywords: Dysarthria/Speech               | PubMed® MeSH terms                                                                                                                                                                                                                                              | Free Text Search Terms (all databases)                                                                                                                                                                                                                                                               |
|-------------------------------------------|-----------------------------------------------------------------------------------------------------------------------------------------------------------------------------------------------------------------------------------------------------------------|------------------------------------------------------------------------------------------------------------------------------------------------------------------------------------------------------------------------------------------------------------------------------------------------------|
|                                           | "dysarthria" or<br>"speech" or<br>"speech sound disorder"<br>or<br>"speech intelligibility" or<br>"speech disorders"                                                                                                                                            | "dysarthria" or<br>"speech" or<br>"speak" or<br>"speaks" or<br>"speaking" or<br>"speaker" or<br>"naturalness" or "intelligibility"                                                                                                                                                                   |
| AND                                       |                                                                                                                                                                                                                                                                 |                                                                                                                                                                                                                                                                                                      |
| Keywords: Respiratory OR Phonatory        | "respiration" or<br>"respiration disorders" or<br>"voice" or<br>"voice disorders" or<br>"voice disorders, neurologic"<br>"phonation" or<br>"dysphonia" or<br>"breathing" or<br>"breathing mechanics" or<br>"respiratory mechanics"<br>or<br>"work of breathing" | "voice" or<br>"dysphonia" or<br>"vocal" or<br>"loudness" or<br>"phonatory" or<br>"phonation" or<br>"singing"<br>"larynx" or<br>"laryngeal" or<br>"laryngoscopy" or<br>"respiration" or<br>"respiratory" or<br>"breath" or<br>"breathe" or<br>"breathing" or<br>"pulmonary" or<br>"work of breathing" |
| AND                                       |                                                                                                                                                                                                                                                                 |                                                                                                                                                                                                                                                                                                      |
| Keywords: Intervention/Intervention Types | "speech therapy" or<br>"speech therapies" or<br>"clinical trial" or<br>"breathing exercises"                                                                                                                                                                    | "treatment" or<br>"treatments" or<br>"therapy" or<br>"therapeutic" or<br>"therapies" or<br>"training" or<br>"management" or<br>"rehabilitation" or<br>"rehabilitate" or<br>"rehab" or<br>"intervention" or<br>"interventions"                                                                        |
| AND                                       |                                                                                                                                                                                                                                                                 |                                                                                                                                                                                                                                                                                                      |
| Keywords: Neuromuscular Disease           | "neuromuscular diseases" or<br>"neurodegenerative diseases"                                                                                                                                                                                                     | "neuromuscular disease" or<br>"neuromuscular diseases" or<br>"neurodegenerative disease"<br>or<br>"neurodegenerative diseases"<br>or<br>"neuropathy" or<br>"neuropathology" or<br>"neuropathological" or                                                                                             |

"Parkinson" or  
"Parkinson's" or  
"Parkinsonian" or  
"progressive supranuclear  
palsy" or  
"PSP" or  
"corticobasal" or  
"CBD" or  
"amyotrophic lateral sclerosis"  
or  
"ALS" or  
"motor neuron disease" or  
"motor neurone disease" or  
"MND" or  
"primary lateral sclerosis" or  
"PLS" or  
"Huntington's" or  
"Huntington" or  
"HD" or  
"muscular dystrophy" or  
"myasthenia gravis" or  
"multiple sclerosis" or  
"MS" or  
"multiple system atrophy" or  
"MSA" or  
"dystonia" or  
"spinocerebellar" or  
"ataxia" or  
"ataxic" or  
"cerebellar" or  
"degeneration" or  
"shy drager" or  
"olivopontocerebellar atrophy"

For all:  
NOT "child" "children"  
"pediatric" "pediatrics" "infant"  
"animal" "animals"  
AND "English" [Language]

---
