# Supplementary material
Source: publisher figshare collection journal article supplement (https://asha.figshare.com/articles/dataset/_/24964473)
Supplement: Supplementary file 43 [file 1]

**Table S8**

*Parkinson's disease: Study Design Details and Participant Characteristics for Biofeedback as a Treatment Modality*

| Source                  | N  | Study design                    | Sex (% female) | Age range (years) | Dysarthria type | Inclusion/exclusion criteria                                                                                                                                                                            | Inferential statistics | Power analysis | Control group | Baseline data collected  | Control intervention | Number of treatment sessions     | Mode of treatment delivery                     | Home exercise plan | Patient-reported outcomes | Treatment effect size |
|-------------------------|----|---------------------------------|----------------|-------------------|-----------------|---------------------------------------------------------------------------------------------------------------------------------------------------------------------------------------------------------|------------------------|----------------|---------------|--------------------------|----------------------|----------------------------------|------------------------------------------------|--------------------|---------------------------|-----------------------|
| Johnson & Pring (1990)  | 12 | Prospective, quasi-experimental | 17.00%         | 59-72             | NR              | Inclusion 1                                                                                                                                                                                             | Yes                    | No             | Yes           | Yes – multiple baselines | No                   | 10 sessions over 4 weeks         | In person, individual                          | Yes                | No                        | No                    |
| Schalling et al. (2013) | 6  | Prospective, quasi-experimental | 16.60%         | 64 - 73           | NR              | Inclusion 1:<br><ul style="list-style-type: none"> <li>• Reduced volume</li> <li>• Ability to increase volume without abusing voice (per SLP)</li> <li>• No voice training since onset of PD</li> </ul> | Yes                    | No             | No            | Yes – multiple baselines | No                   | 1 – 7 days of active biofeedback | Biofeedback device worn outside of clinic only | No                 | Yes                       | No                    |
| Searl & Dietrich (2015) | 20 | Prospective, quasi-experimental | 45.00%         | 47-89             | NR              | NR                                                                                                                                                                                                      | Yes                    | No             | Yes           | Yes – single baseline    | No                   | 5 days                           | Biofeedback device worn outside of clinic only | Yes                | Yes                       | No                    |

*Note.* PD, Parkinson's disease. SLP, Speech-language Pathologist. NR, not reported. Inclusion criteria: <sup>1</sup>Parkinson's disease.
