# Supplementary material
Source: publisher figshare collection journal article supplement (https://asha.figshare.com/articles/dataset/_/24964473)
Supplement: Supplementary file 44 [file 1]

**Table S3.1**

*Parkinson's disease: PEDro Scores for Studies Describing SPEAK OUT!® and The LOUD Crowd as Interventions for Dysarthria*

| Source                | Item on PEDro Scale  |                   |                      |                                  |                          |                        |                       |                                    |                 |                          |                                | Overall Score |
|-----------------------|----------------------|-------------------|----------------------|----------------------------------|--------------------------|------------------------|-----------------------|------------------------------------|-----------------|--------------------------|--------------------------------|---------------|
|                       | Eligibility Criteria | Random Allocation | Concealed Allocation | Participants Similar at Baseline | Blinding of Participants | Blinding of Therapists | Blinding of Assessors | Outcomes from >85% of Participants | Intent to Treat | Between Group Comparison | Point and Variability Measures |               |
| Behrman et al. (2020) | X                    |                   |                      |                                  |                          |                        |                       | X                                  | X               | X                        | X                              | 5             |
| Boutsen et al. (2018) |                      |                   |                      |                                  |                          |                        | X                     | X                                  | X               |                          | X                              | 4             |

*Note.* PEDro, Physiotherapy Evidence Database. The letter 'X' indicates the presence of an item in a specific study; an empty cell represents the absence of an item in a specific study.
