# Supplementary material
Source: publisher figshare collection journal article supplement (https://asha.figshare.com/articles/dataset/_/24964473)
Supplement: Supplementary file 45 [file 1]

**Table S19**

*Autosomal Recessive Spastic Ataxia of Charlevoix-Saguenay: Study Design Details and Participant Characteristics for Melbourne Ataxia Speech Treatment as a Treatment Modality*

| Source              | N | Study design                    | Sex (% female) | Age range (years) | Dysarthria type | Inclusion/exclusion criteria                                                                                                                                                                  | Inferential statistics | Power analysis | Control group | Baseline data collected  | Control intervention | Number of treatment sessions | Mode of treatment delivery | Home exercise plan | Patient-reported outcomes | Treatment effect size |
|---------------------|---|---------------------------------|----------------|-------------------|-----------------|-----------------------------------------------------------------------------------------------------------------------------------------------------------------------------------------------|------------------------|----------------|---------------|--------------------------|----------------------|------------------------------|----------------------------|--------------------|---------------------------|-----------------------|
| Vogel et al. (2019) | 7 | Prospective; quasi-experimental | 71.40%         | NR                | NR              | Inclusion: <ul style="list-style-type: none"> <li>Genetically-confirmed ARSACS</li> <li>Age &gt; 17 years</li> <li>SARA total score &gt; 3 and speech subscore <math>\geq 2</math></li> </ul> | Yes                    | No             | No            | Yes – multiple baselines | No                   | Not reported                 | Telepractice, individual   | Yes                | No                        | No                    |

*Note.* NR, not reported. ARSACS, autosomal recessive spastic ataxia of Charlevoix-Saguenay. SARA, Scale for the Assessment and Rating of Ataxia.
