# Supplementary material
Source: publisher figshare collection journal article supplement (https://asha.figshare.com/articles/dataset/_/24964473)
Supplement: Supplementary file 46 [file 1]

**Table S19.1**  
*Autosomal Recessive Spastic Ataxia of Charlevoix-Saguenay: PEDro Scores for the Study Describing Melbourne Ataxia Speech Treatment as an Intervention for Dysarthria*

| Item on PEDro Scale |                      |                   |                      |                                  |                          |                        |                       |                                    |                 |                          |                                |               |
|---------------------|----------------------|-------------------|----------------------|----------------------------------|--------------------------|------------------------|-----------------------|------------------------------------|-----------------|--------------------------|--------------------------------|---------------|
| Source              | Eligibility Criteria | Random Allocation | Concealed Allocation | Participants Similar at Baseline | Blinding of Participants | Blinding of Therapists | Blinding of Assessors | Outcomes from >85% of Participants | Intent to Treat | Between Group Comparison | Point and Variability Measures | Overall Score |
| Vogel et al. (2019) | X                    |                   |                      |                                  |                          |                        |                       | X                                  | X               |                          | X                              | 4             |

*Note.* PEDro, Physiotherapy Evidence Database. The letter ‘X’ indicates the presence of an item in a specific study; an empty cell represents the absence of an item in a specific study
