# Supplementary material
Source: publisher figshare collection journal article supplement (https://asha.figshare.com/articles/dataset/_/24964473)
Supplement: Supplementary file 47 [file 1]

**Table S13.1**

*Parkinson's disease: PEDro Scores for the Study Describing Group Dynamics/Coaching Strategies as an Intervention for Dysarthria*

| Source                 | Eligibility Criteria | Random Allocation | Concealed Allocation | Participants Similar at Baseline | Blinding of Participants | Item on PEDro Scale    |                       |  | Outcomes from >85% of Participants | Intent to Treat | Between Group Comparison | Point and Variability Measures | Overall Score |
|------------------------|----------------------|-------------------|----------------------|----------------------------------|--------------------------|------------------------|-----------------------|--|------------------------------------|-----------------|--------------------------|--------------------------------|---------------|
|                        |                      |                   |                      |                                  |                          | Blinding of Therapists | Blinding of Assessors |  |                                    |                 |                          |                                |               |
| Diaféria et al. (2017) |                      | X                 |                      | X                                |                          |                        | X                     |  | X                                  | X               | X                        | X                              | 7             |

*Note.* PEDro, Physiotherapy Evidence Database. The letter 'X' indicates the presence of an item in a specific study; an empty cell represents the absence of an item in a specific study
