# Supplementary material
Source: publisher figshare collection journal article supplement (https://asha.figshare.com/articles/dataset/_/24964473)
Supplement: Supplementary file 50 [file 1]

**Table S13**

*Parkinson's disease: Study Design Details and Participant Characteristics for Group Dynamics/Coaching Strategies as a Treatment Modality*

| Source                | N  | Study design                    | Sex (% female) | Age range (years) | Dysarthria type | Inclusion/exclusion criteria                                                                                                                        | Inferential statistics | Power analysis | Control group | Baseline data collected | Control intervention | Number of treatment sessions   | Mode of treatment delivery | Home exercise plan | Patient-reported outcomes | Treatment effect size |
|-----------------------|----|---------------------------------|----------------|-------------------|-----------------|-----------------------------------------------------------------------------------------------------------------------------------------------------|------------------------|----------------|---------------|-------------------------|----------------------|--------------------------------|----------------------------|--------------------|---------------------------|-----------------------|
| Diafari et al. (2017) | 16 | Prospective, quasi-experimental | NR             | Mean = 65.4       | NR              | Inclusion:<br>• PD<br>Exclusion:<br>• Other neurological disease<br>• Non-PD-related voice problem<br>• ICODE > 3.3 suggestive of cognitive decline | Yes                    | No             | Yes           | Yes – single baseline   | Yes                  | 16 (2 days p/week for 8 weeks) | In person, group           | No                 | Yes                       | No                    |

*Note.* PD, Parkinson's disease; NR, Not reported; ICODE, Informant questionnaire on cognitive decline in the elderly.
