# Supplementary material
Source: publisher figshare collection journal article supplement (https://asha.figshare.com/articles/dataset/_/24964473)
Supplement: Supplementary file 51 [file 1]

**Table S12**

*Parkinson's disease: Study Design Details and Participant Characteristics for Expiratory Muscle Strength Training as a Treatment Modality*

| Source                       | N  | Study design                | Sex (% female) | Age range (years) | Dysarthria type | Inclusion/exclusion criteria                                                                                                                                                                                                                                                                                                                                                                                                                                                | Inferential statistics | Power analysis | Control group | Baseline data collected  | Control intervention | Number of treatment sessions   | Mode of treatment delivery | Home exercise plan | Patient-reported outcomes | Treatment effect size |
|------------------------------|----|-----------------------------|----------------|-------------------|-----------------|-----------------------------------------------------------------------------------------------------------------------------------------------------------------------------------------------------------------------------------------------------------------------------------------------------------------------------------------------------------------------------------------------------------------------------------------------------------------------------|------------------------|----------------|---------------|--------------------------|----------------------|--------------------------------|----------------------------|--------------------|---------------------------|-----------------------|
| Darling-White & Huber (2017) | 12 | Prospective, single-subject | 25.00%         | 66-82             | NR              | <ul style="list-style-type: none"> <li>Inclusion:</li> <li>• Speech characteristics indicative of speech breathing deficits per SLP</li> <li>• No severe depression per the Beck Depression Inventory</li> <li>• No neurological diseases except PD</li> <li>• No hypertension</li> <li>• No respiratory illness</li> <li>• No head, neck, or chest surgery except DBS</li> <li>• Non-smoking</li> <li>• Free of infections, colds, or allergies on testing days</li> </ul> | Yes                    | No             | No            | Yes – multiple baselines | No                   | 20 (5 days p/week for 4 weeks) | In person, individual      | Yes                | No                        | Yes                   |

*Note.* PD, Parkinson's disease; SLP, Speech-language Pathologist. NR, not reported.
